# Supplementary material for: Effect of Steric Constraint at the γ-Backbone Position on the Conformations and Hybridization Properties of PNAs
Source: PubMed Central journal article supplement (PMC3138043; doi:10.4061/2011/652702), 2011-05-25

**Effect of Steric Constraint at the  $\gamma$ -Backbone Position on the Conformations and Hybridization Properties of PNAs**

Matthew J. Crawford, Srinivas Rapireddy, Raman Bahal, Iulia Sacui, and Danith H. Ly\*

*Department of Chemistry and Center for Nucleic Acids Science and Technology  
(CNAST), Carnegie Mellon University,  
4400 Fifth Avenue, Pittsburgh, PA 15213*

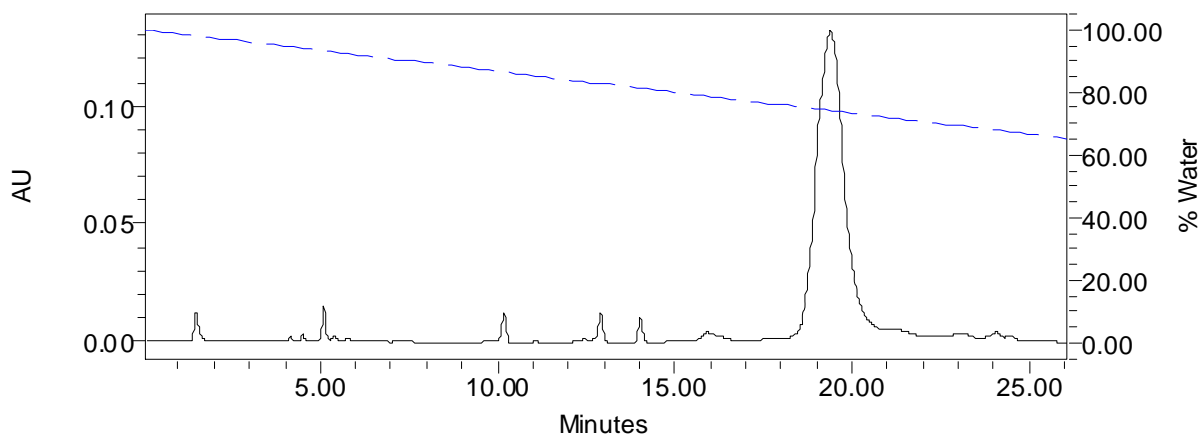

**Figure S1.** HPLC trace of the crude PNA7 oligomer. Eluent A: 0.1% TFA in water and eluent B: 0.1% TFA in ACN. The gradient was 0-40% of eluent B in 40 minutes at 45°C with a flow rate of 3.0 mL/min.

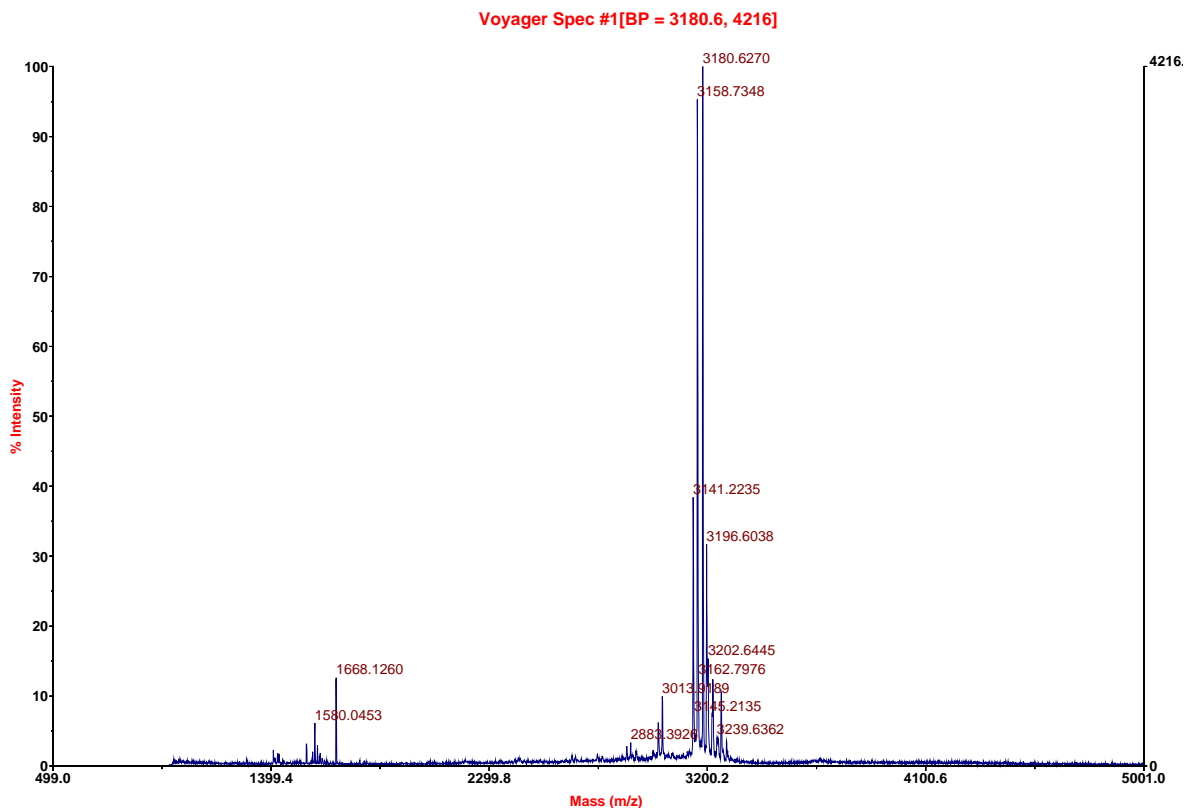

**Figure S2.** MALDI-TOF profile of PNA7 oligomer. Mass calculated: 3157.0, observed 3158.73, 3180.63 ( $3157.0 + \text{Na}^+$ ), and 1668.13 (1/2 mass).

| <i>Oligomer Name</i>                  | <i>Mass Calculated (m/z)</i> | <i>Experimental Mass (m/z)</i> |
|---------------------------------------|------------------------------|--------------------------------|
| <b>PNA1 (Unmodified)</b>              | 2887                         | 2885                           |
| <b>PNA2 (Alanine Mod)</b>             | 2901                         | 2899                           |
| <b>PNA3 (Valine Mod)</b>              | 2929                         | 2927                           |
| <b>PNA4 (Isoleucine Mod)</b>          | 2943                         | 2942                           |
| <b>PNA5 (Phenylalanine Mod)</b>       | 2977                         | 2976                           |
| <b>PNA6 (Phenylalanine 3 Alt Mod)</b> | 3157                         | 3158                           |
| <b>PNA7 (Phenylalanine 3 Con Mod)</b> | 3157                         | 3158                           |
| <b>PNA8 (Valine 3 Alt Mod)</b>        | 3011                         | 3008                           |
| <b>PNA9 (Valine 3 Con Mod)</b>        | 3011                         | 3008                           |

**Figure S3.** Calculated and observed masses (MALDI-TOF MS) for the PNA and  $\gamma$ -Modified PNA oligomers utilized in the studies.

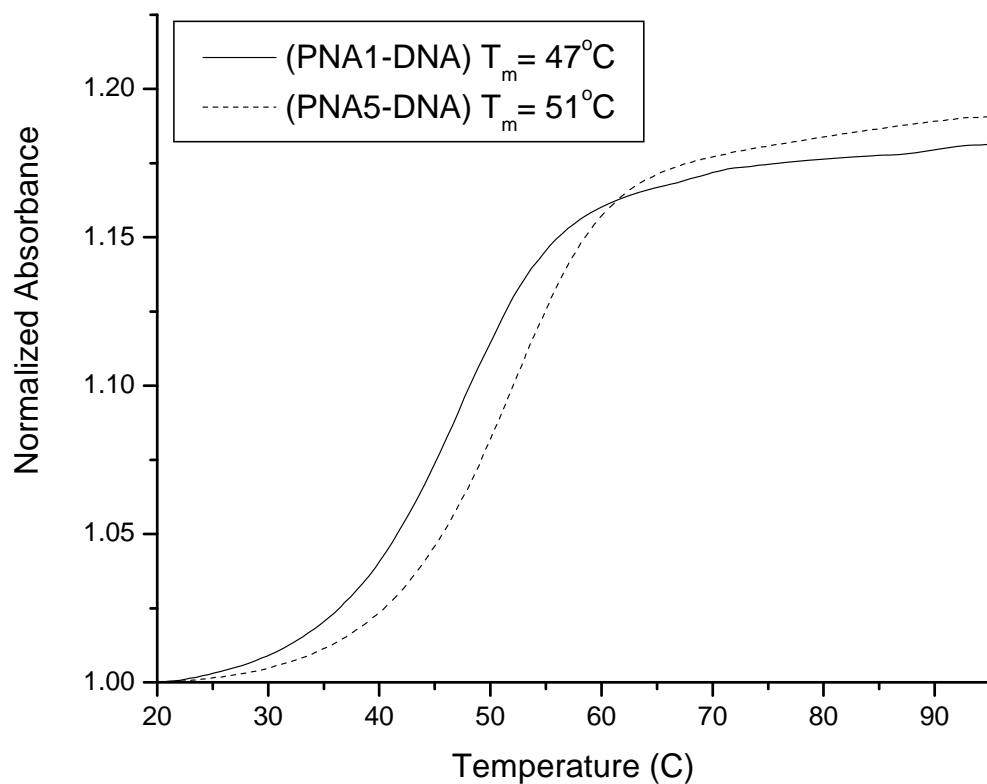

**Figure S4.** UV-melting curves of PNA1-DNA and PNA5-DNA duplexes containing perfectly matched sequences. The samples were prepared in buffer containing 0.1 mM EDTA, 100 mM NaCl, 10 mM sodium phosphate (pH 7.0) at  $5\mu\text{M}$  duplex strand concentration each. The  $T_m$ s were determined by taking the first derivatives of the UV-melting curves.

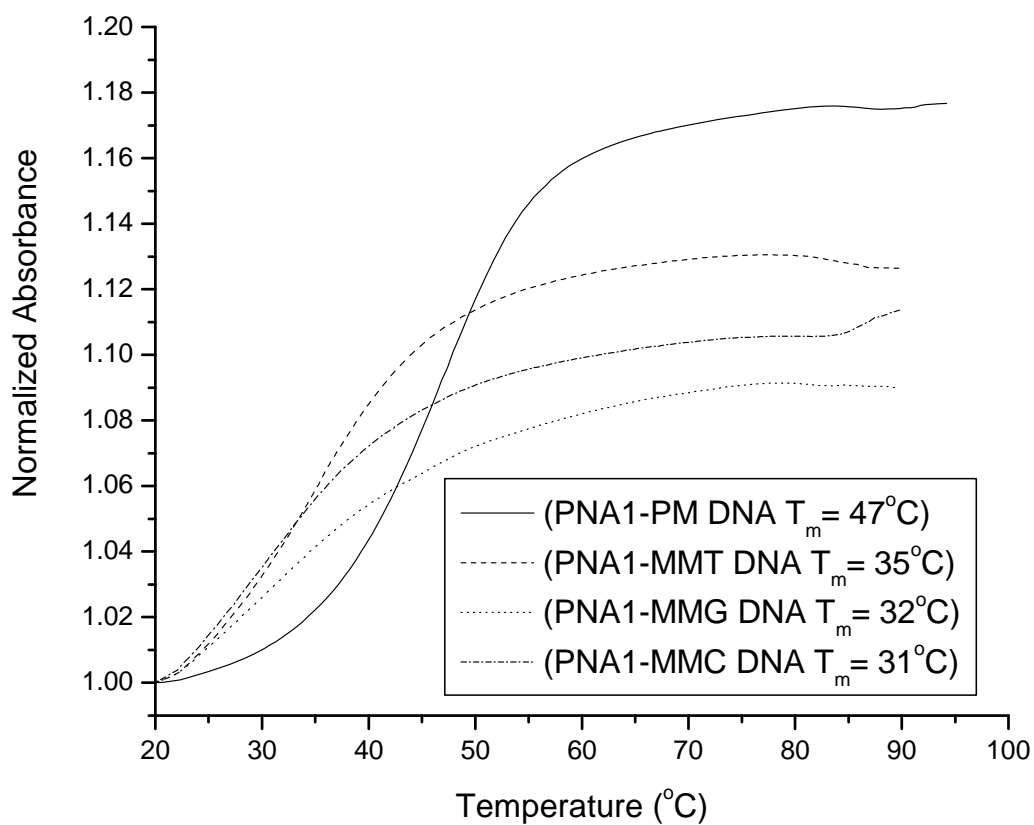

**Figure S5.** UV-melting curves of PNA1-DNA duplexes containing perfectly matched (PM) and mismatch (MM) sequences. The samples were prepared in buffer containing 0.1 mM EDTA, 100 mM NaCl, 10 mM sodium phosphate (pH 7.0) at 5  $\mu\text{M}$  duplex strand concentration each. The  $T_m$ s were determined by taking the first derivatives of the UV-melting curves.

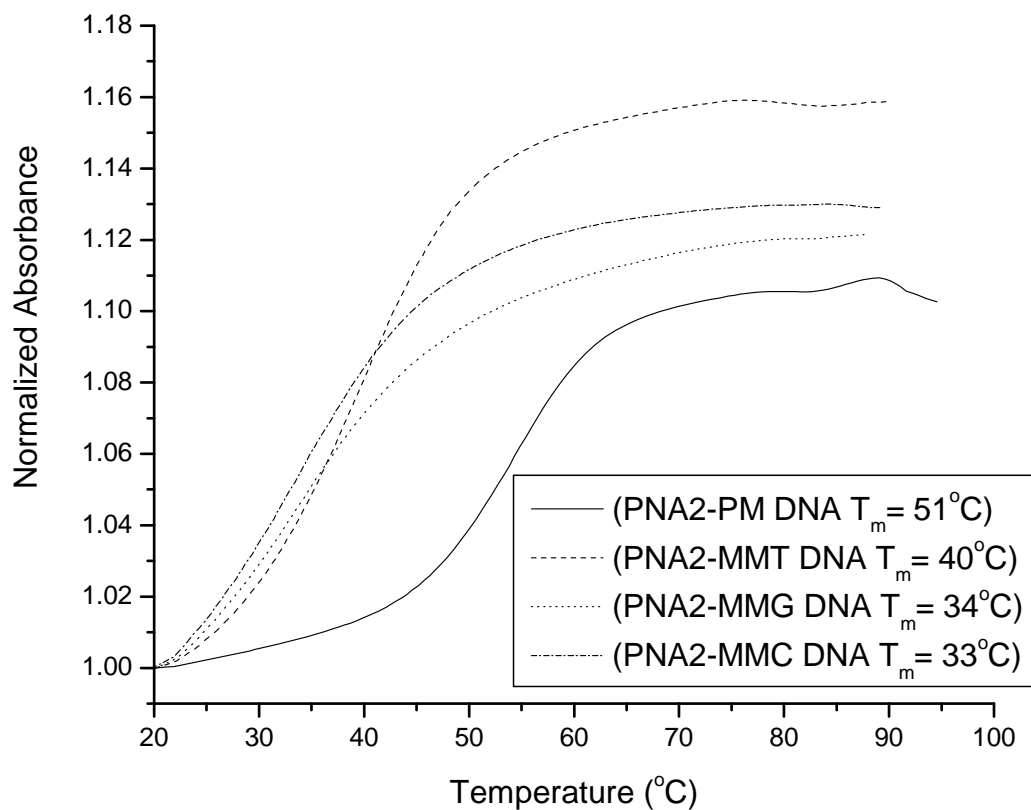

**Figure S6.** UV-melting curves of PNA2-DNA duplexes containing perfectly matched (PM) and mismatch (MM) sequences. The samples were prepared in buffer containing 0.1 mM EDTA, 100 mM NaCl, 10 mM sodium phosphate (pH 7.0) at 5  $\mu$ M duplex strand concentration each. The T<sub>m</sub>s were determined by taking the first derivatives of the UV-melting curves.

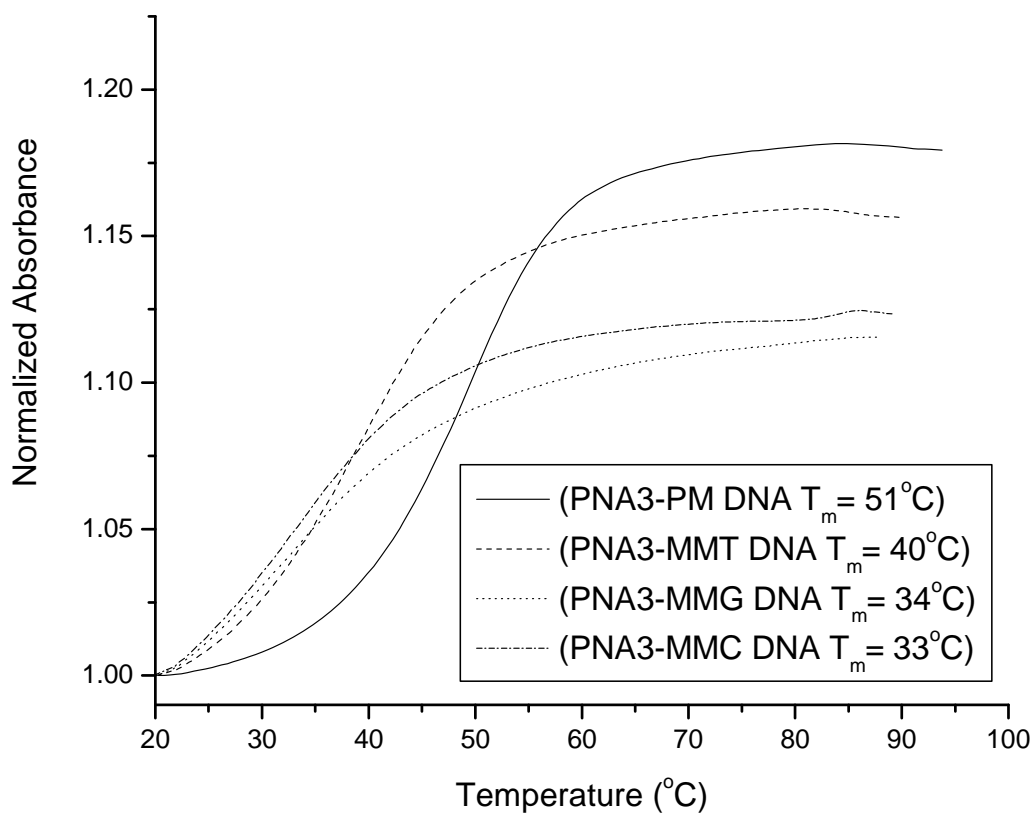

**Figure S7.** UV-melting curves of PNA3-DNA duplexes containing perfectly matched (PM) and mismatch (MM) sequences. The samples were prepared in buffer containing 0.1 mM EDTA, 100 mM NaCl, 10 mM sodium phosphate (pH 7.0) at 5  $\mu$ M duplex strand concentration each. The  $T_m$ s were determined by taking the first derivatives of the UV-melting curves.

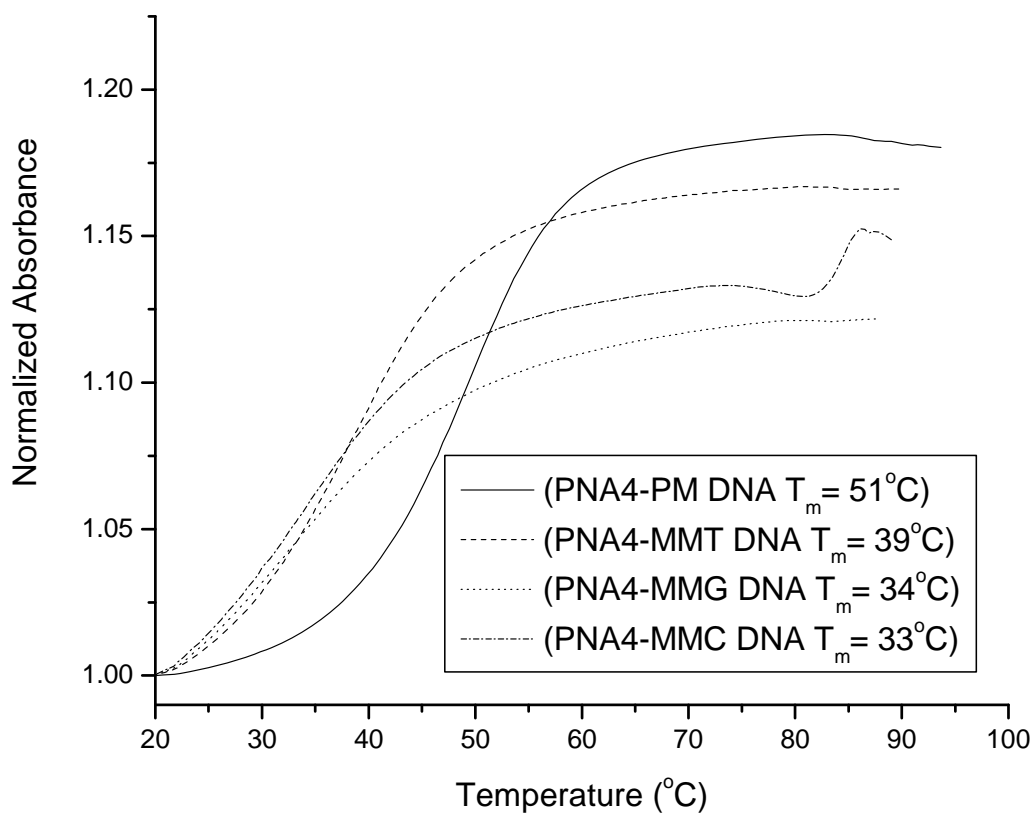

**Figure S8.** UV-melting curves of PNA4-DNA duplexes containing perfectly matched (PM) and mismatch (MM) sequences. The samples were prepared in buffer containing 0.1 mM EDTA, 100 mM NaCl, 10 mM sodium phosphate (pH 7.0) at 5  $\mu\text{M}$  duplex strand concentration each. The  $T_m$ s were determined by taking the first derivatives of the UV-melting curves.



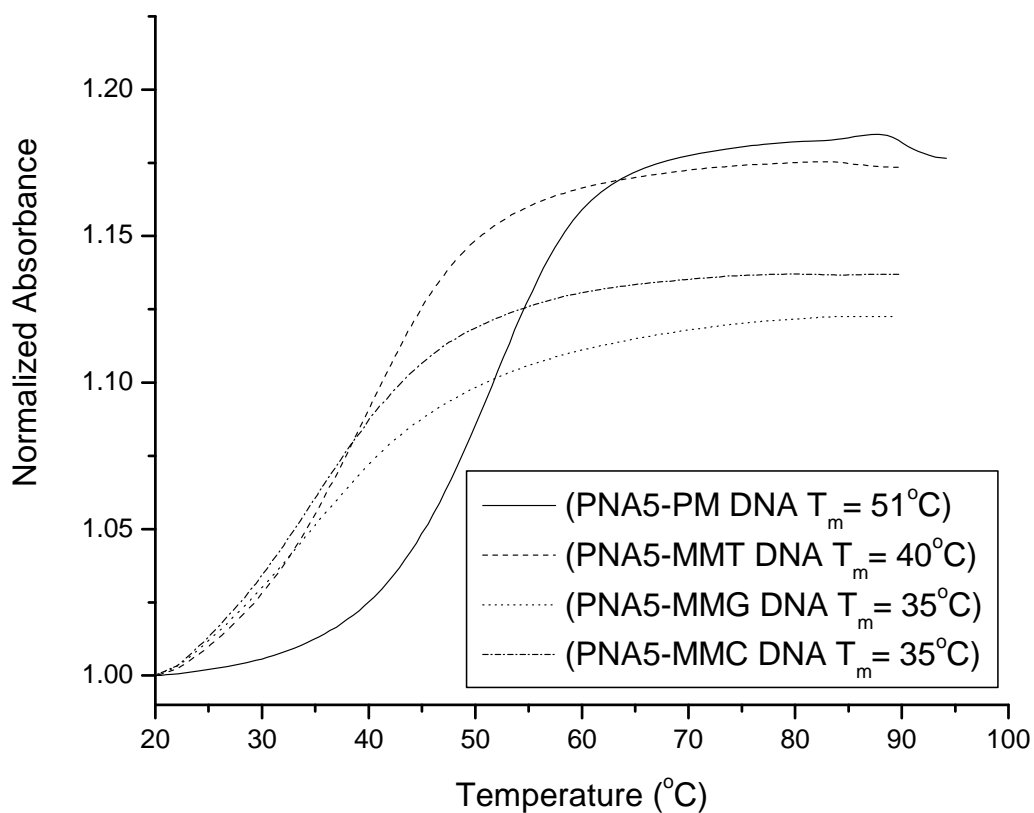

**Figure S9.** UV-melting curves of PNA5-DNA duplexes containing perfectly matched (PM) and mismatch (MM) sequences. The samples were prepared in buffer containing 0.1 mM EDTA, 100 mM NaCl, 10 mM sodium phosphate (pH 7.0) at  $5\mu\text{M}$  duplex strand concentration each. The  $T_m$ s were determined by taking the first derivatives of the UV-melting curves.

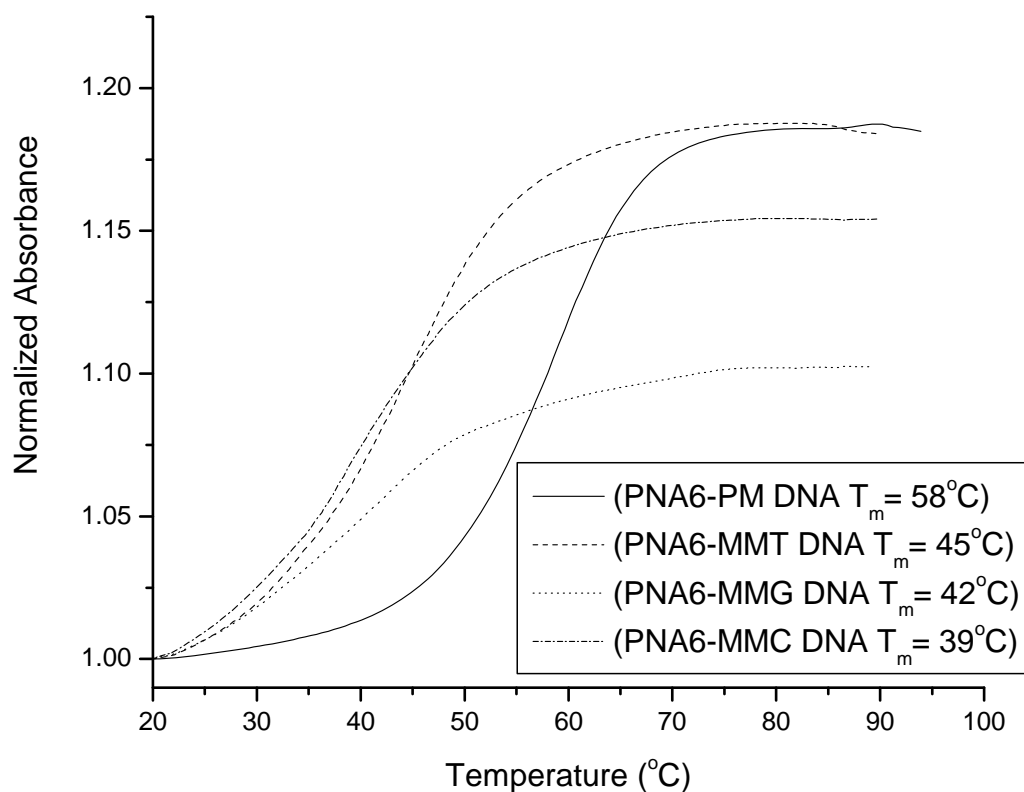

**Figure S10.** UV-melting curves of PNA6-DNA duplexes containing perfectly matched (PM) and mismatch (MM) sequences. The samples were prepared in buffer containing 0.1 mM EDTA, 100 mM NaCl, 10 mM sodium phosphate (pH 7.0) at  $5\mu\text{M}$  duplex strand concentration each. The  $T_m$ s were determined by taking the first derivatives of the UV-melting curves.

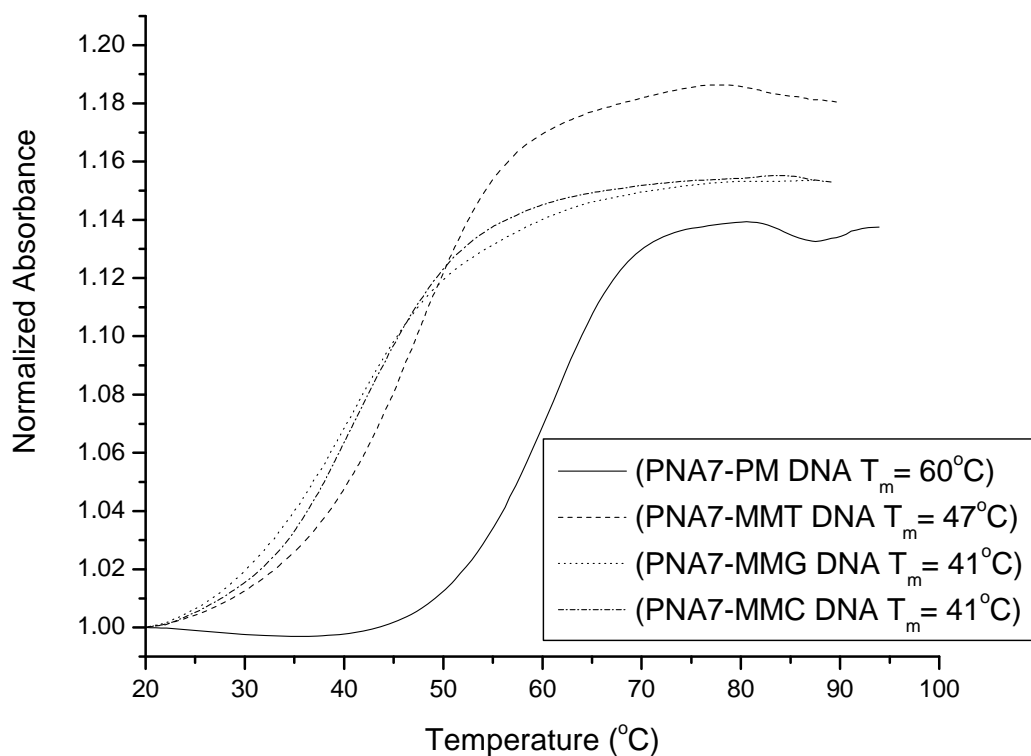

**Figure S11.** UV-melting curves of PNA7-DNA duplexes containing perfectly matched (PM) and mismatch (MM) sequences. The samples were prepared in buffer containing 0.1 mM EDTA, 100 mM NaCl, 10 mM sodium phosphate (pH 7.0) at  $5\mu\text{M}$  duplex strand concentration each. The  $T_m$ s were determined by taking the first derivatives of the UV-melting curves.

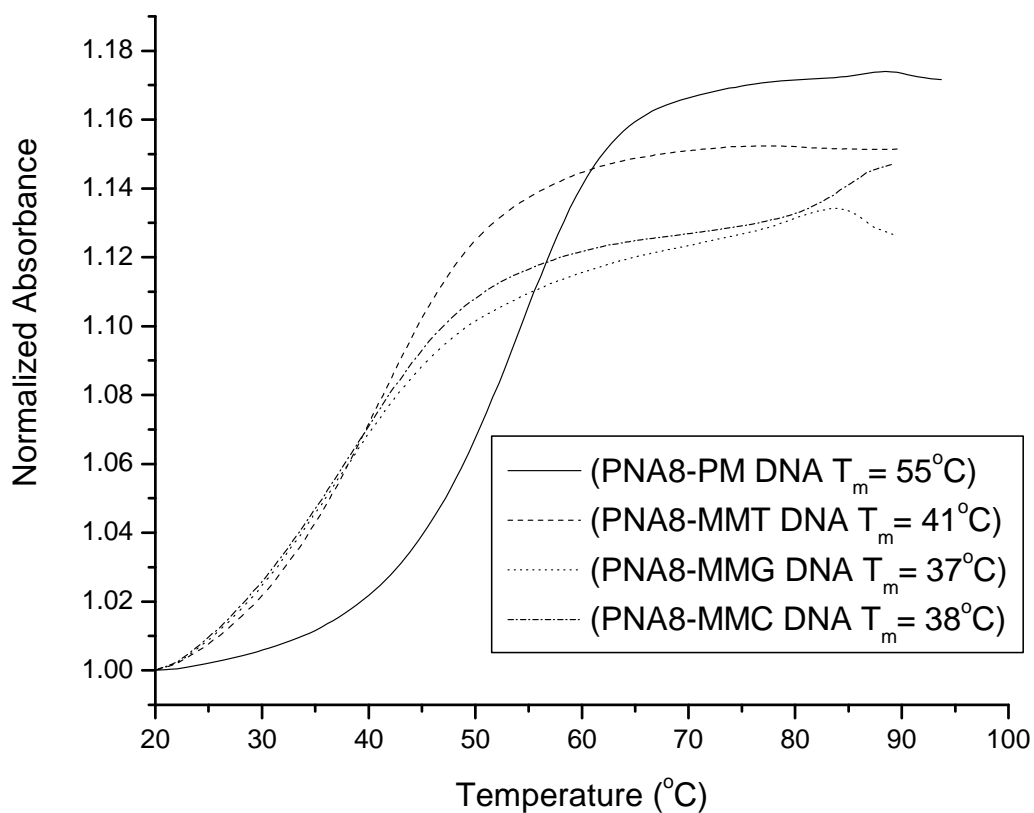

**Figure S12.** UV-melting curves of PNA8-DNA duplexes containing perfectly matched (PM) and mismatch (MM) sequences. The samples were prepared in buffer containing 0.1 mM EDTA, 100 mM NaCl, 10 mM sodium phosphate (pH 7.0) at 5  $\mu\text{M}$  duplex strand concentration each. The  $T_m$ s were determined by taking the first derivatives of the UV-melting curves.

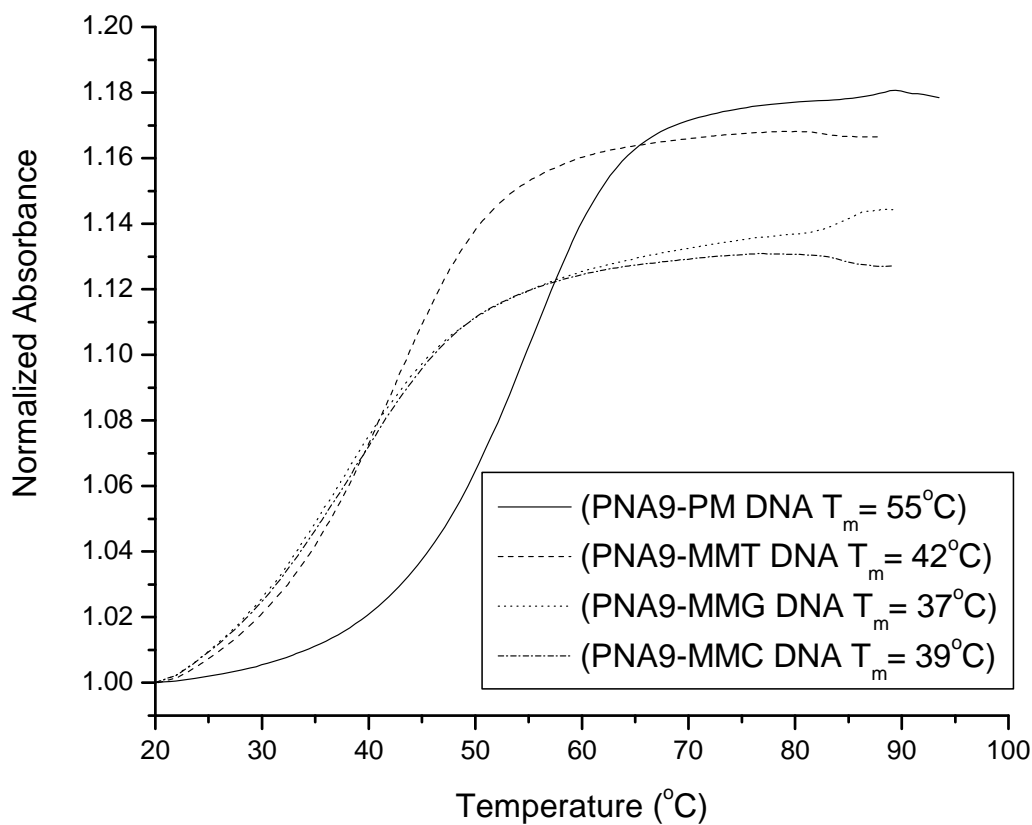

**Figure S13.** UV-melting curves of PNA9-DNA duplexes containing perfectly matched (PM) and mismatch (MM) sequences. The samples were prepared in buffer containing 0.1 mM EDTA, 100 mM NaCl, 10 mM sodium phosphate (pH 7.0) at 5  $\mu\text{M}$  duplex strand concentration each. The  $T_m$ s were determined by taking the first derivatives of the UV-melting curves.

$^1\text{H}$ NMR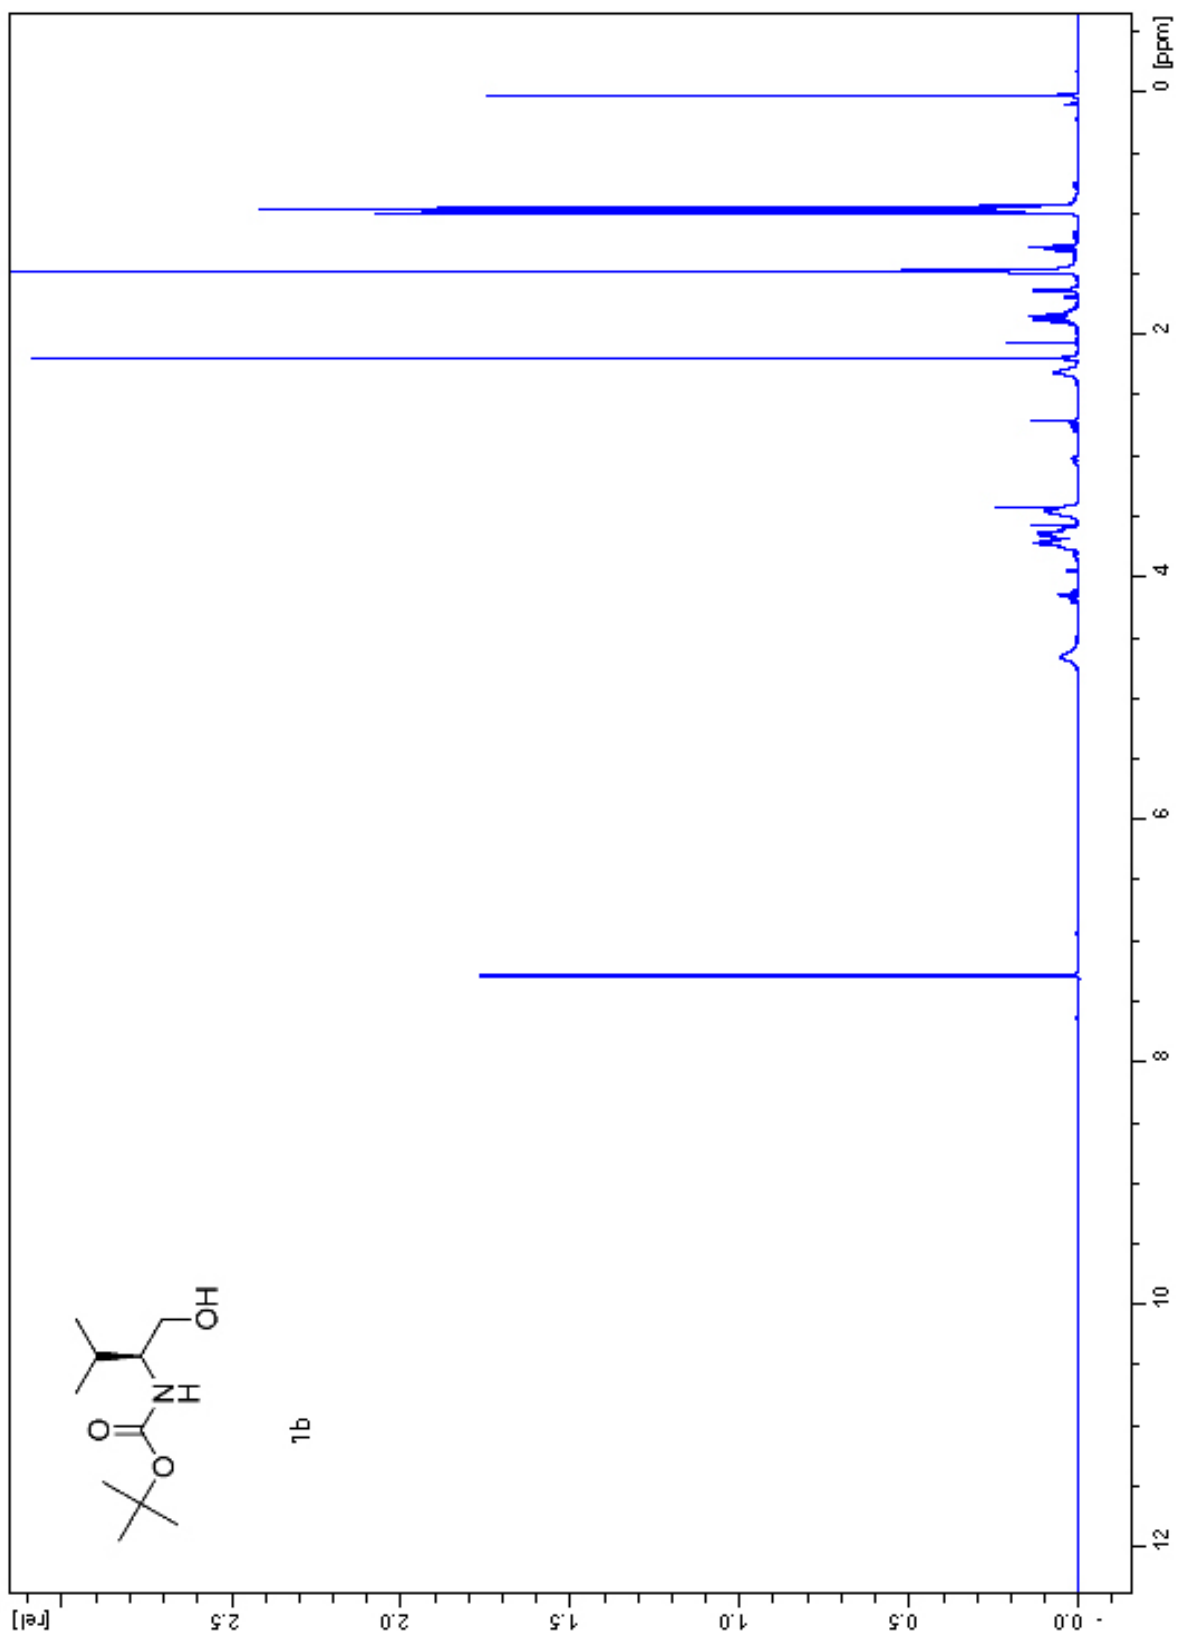

$^1\text{H}$  NMR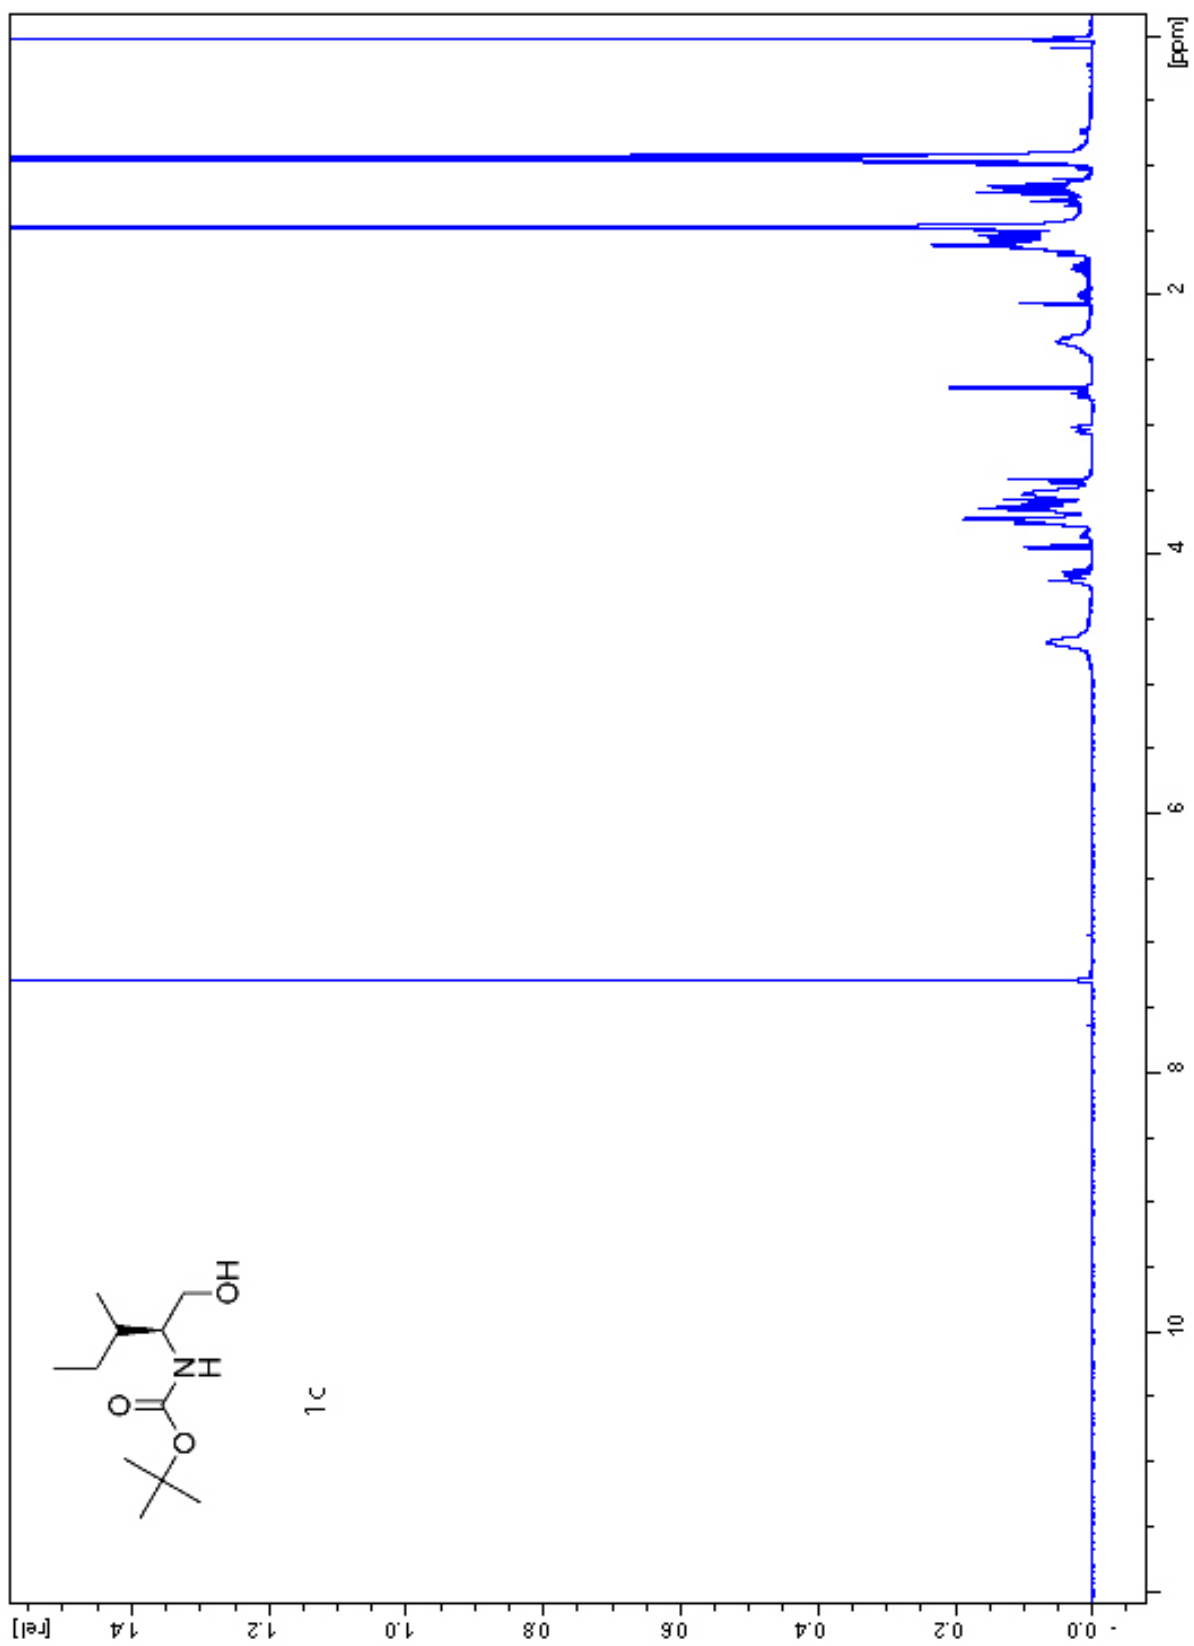

$^1\text{H}$  NMR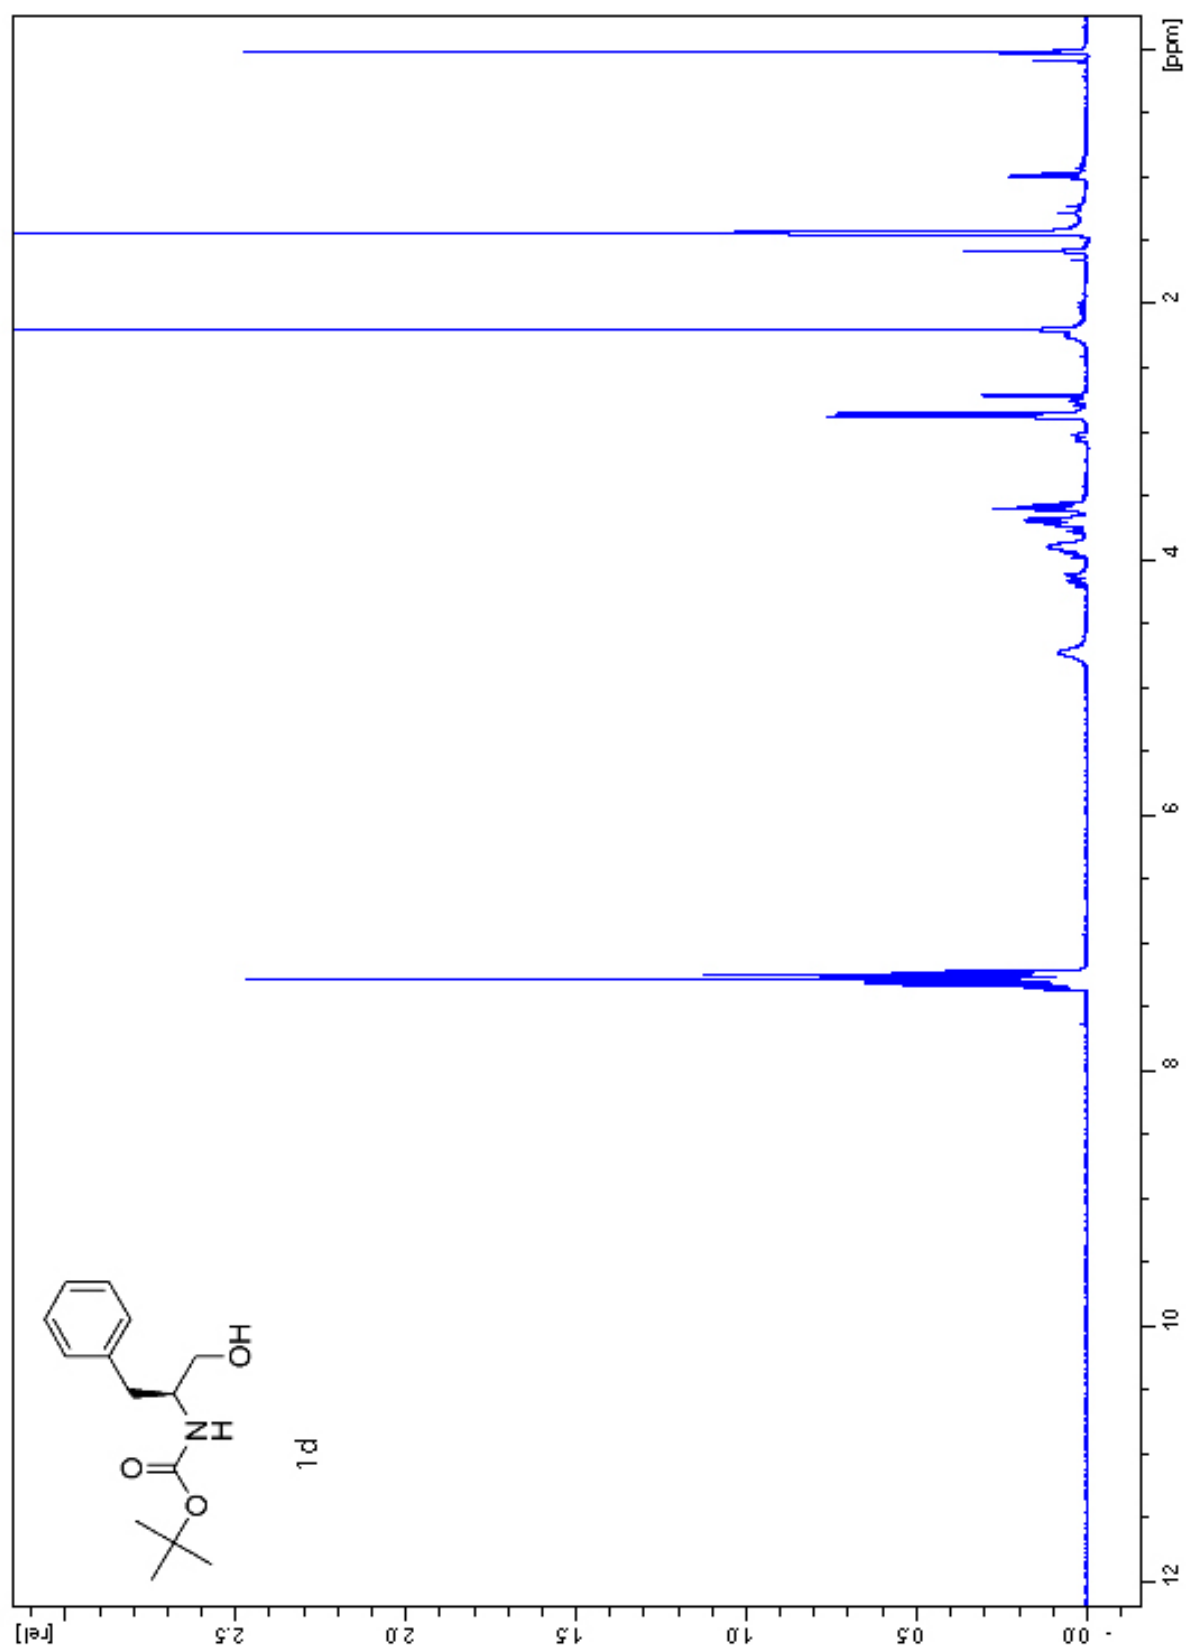



$^1\text{H}$  NMR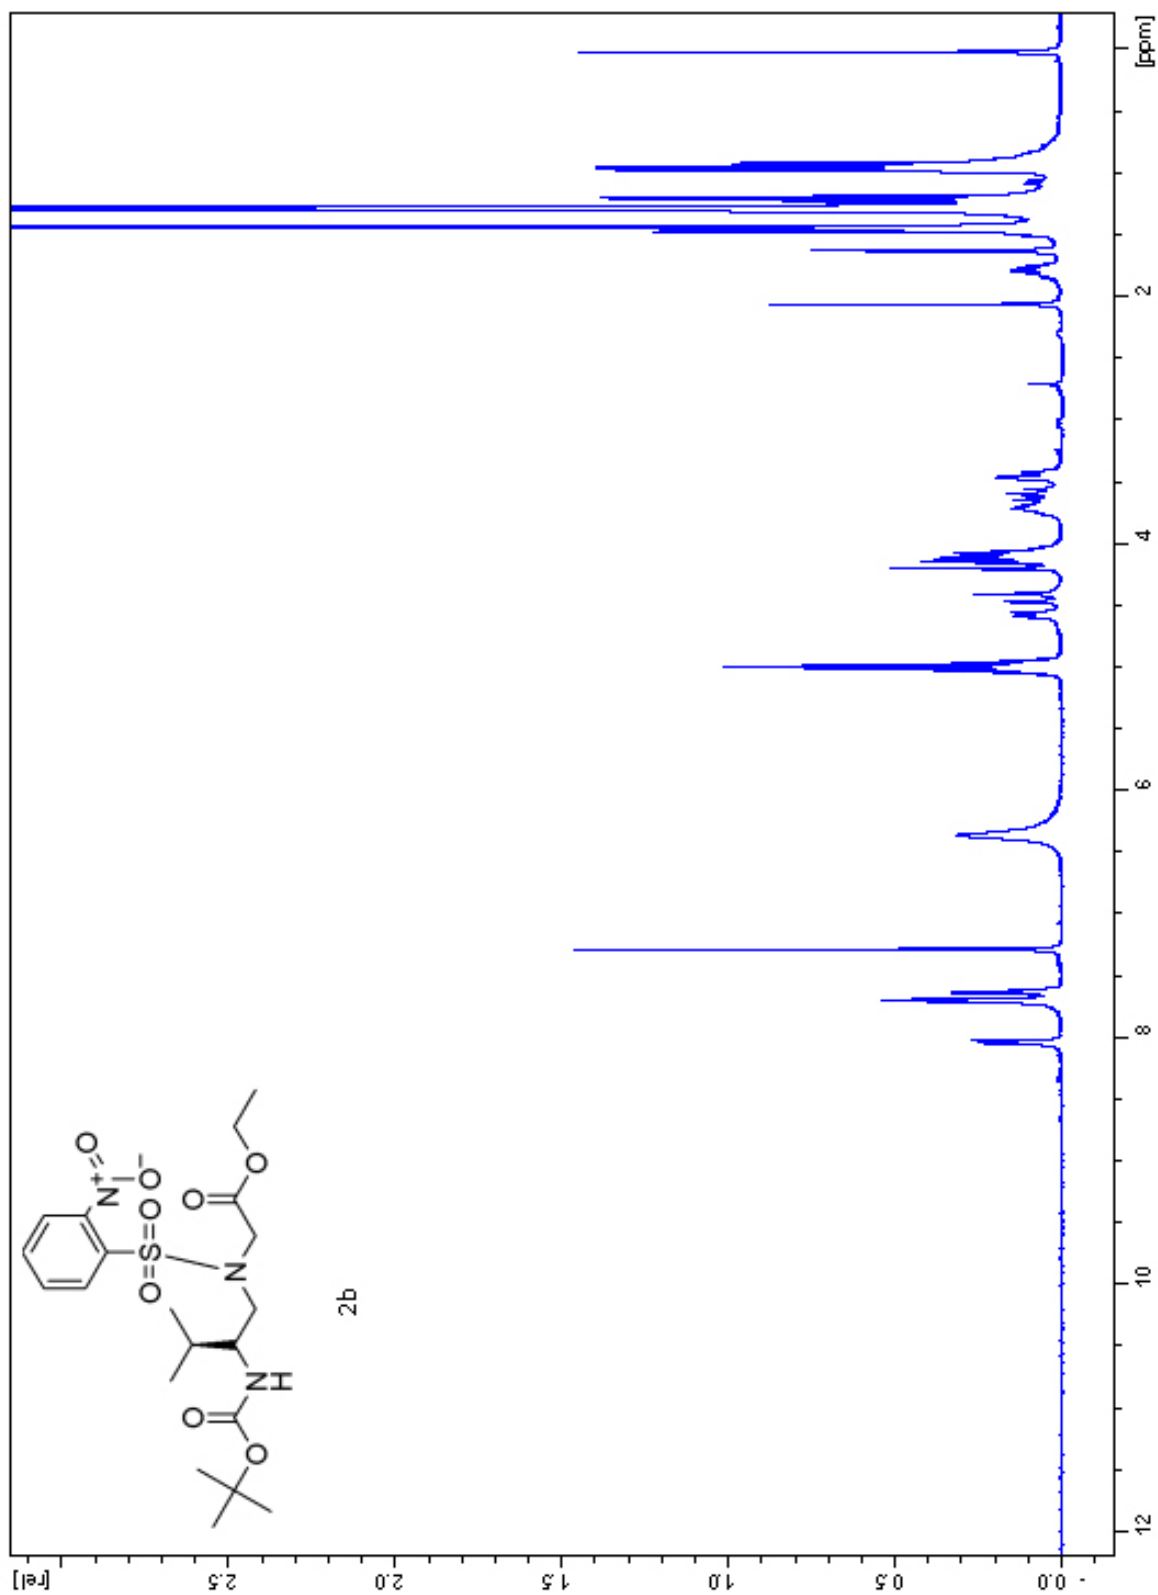

$^1\text{H}$  NMR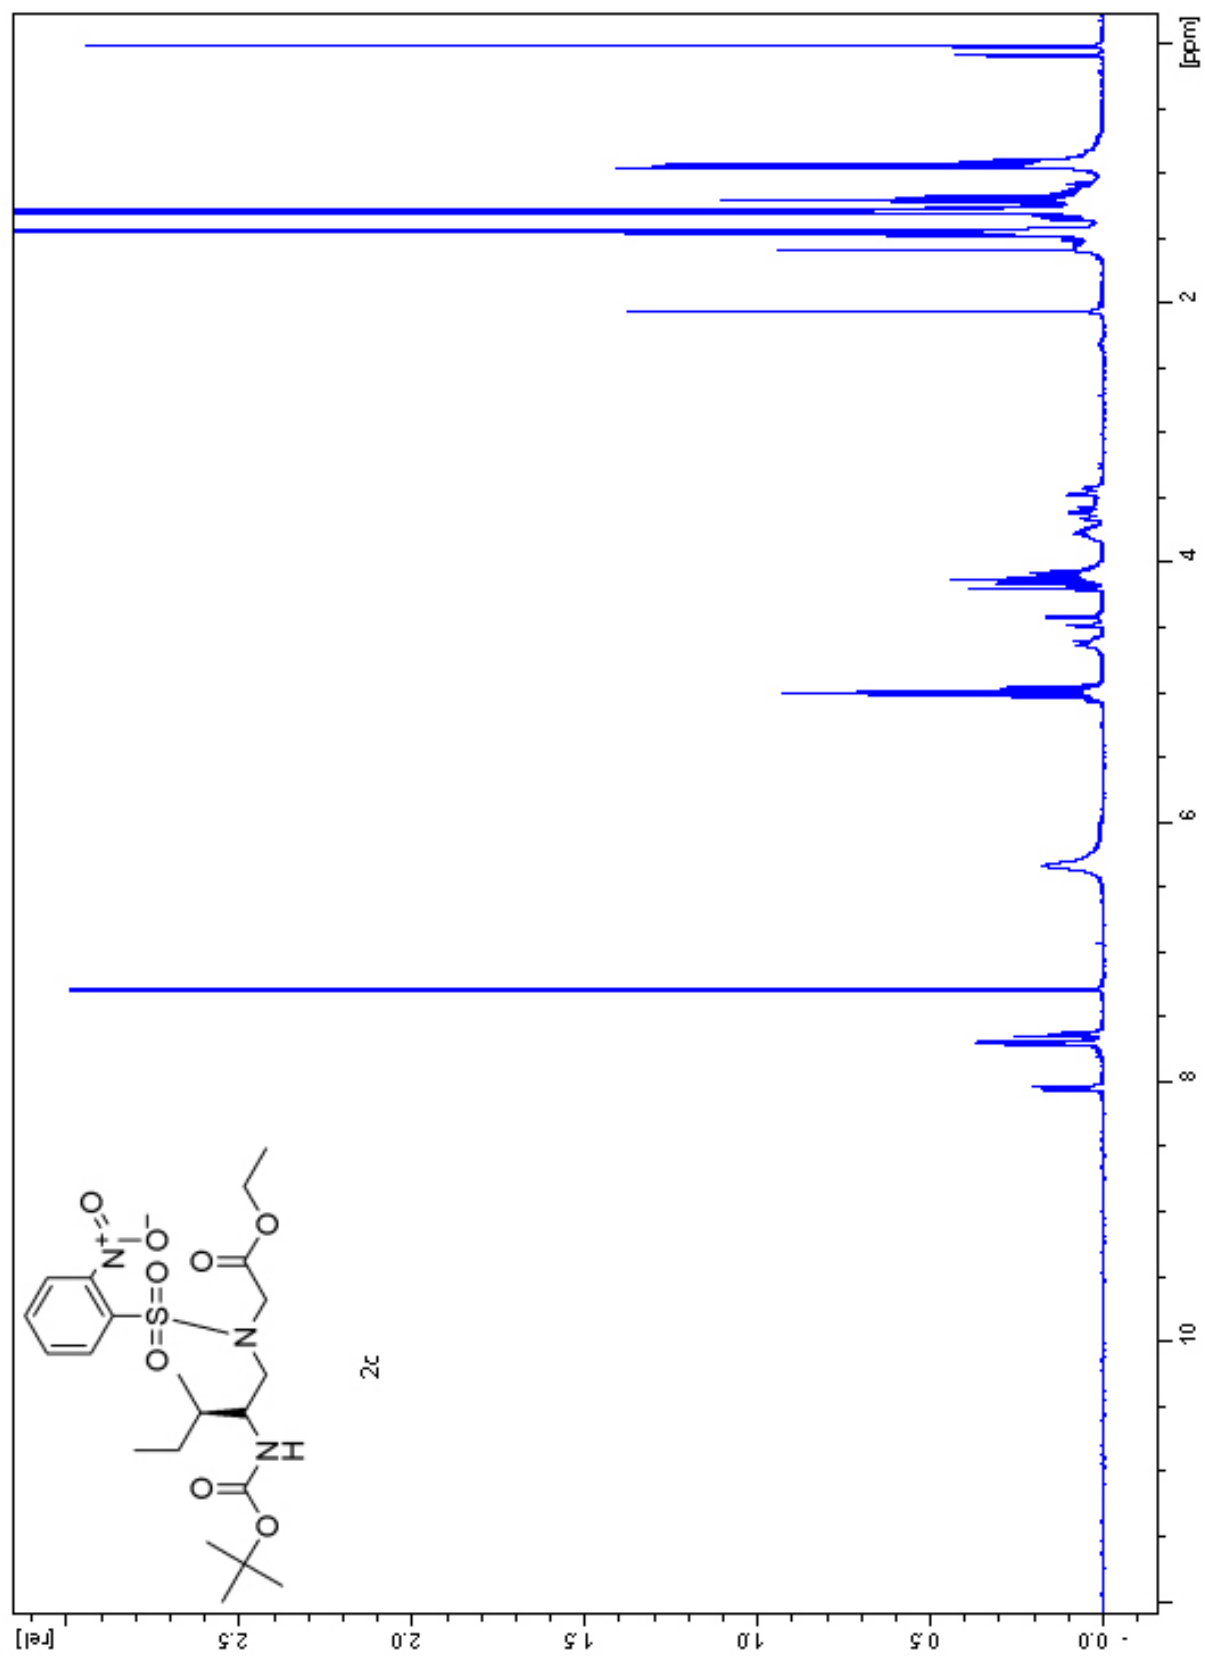

$^1\text{H}$  NMR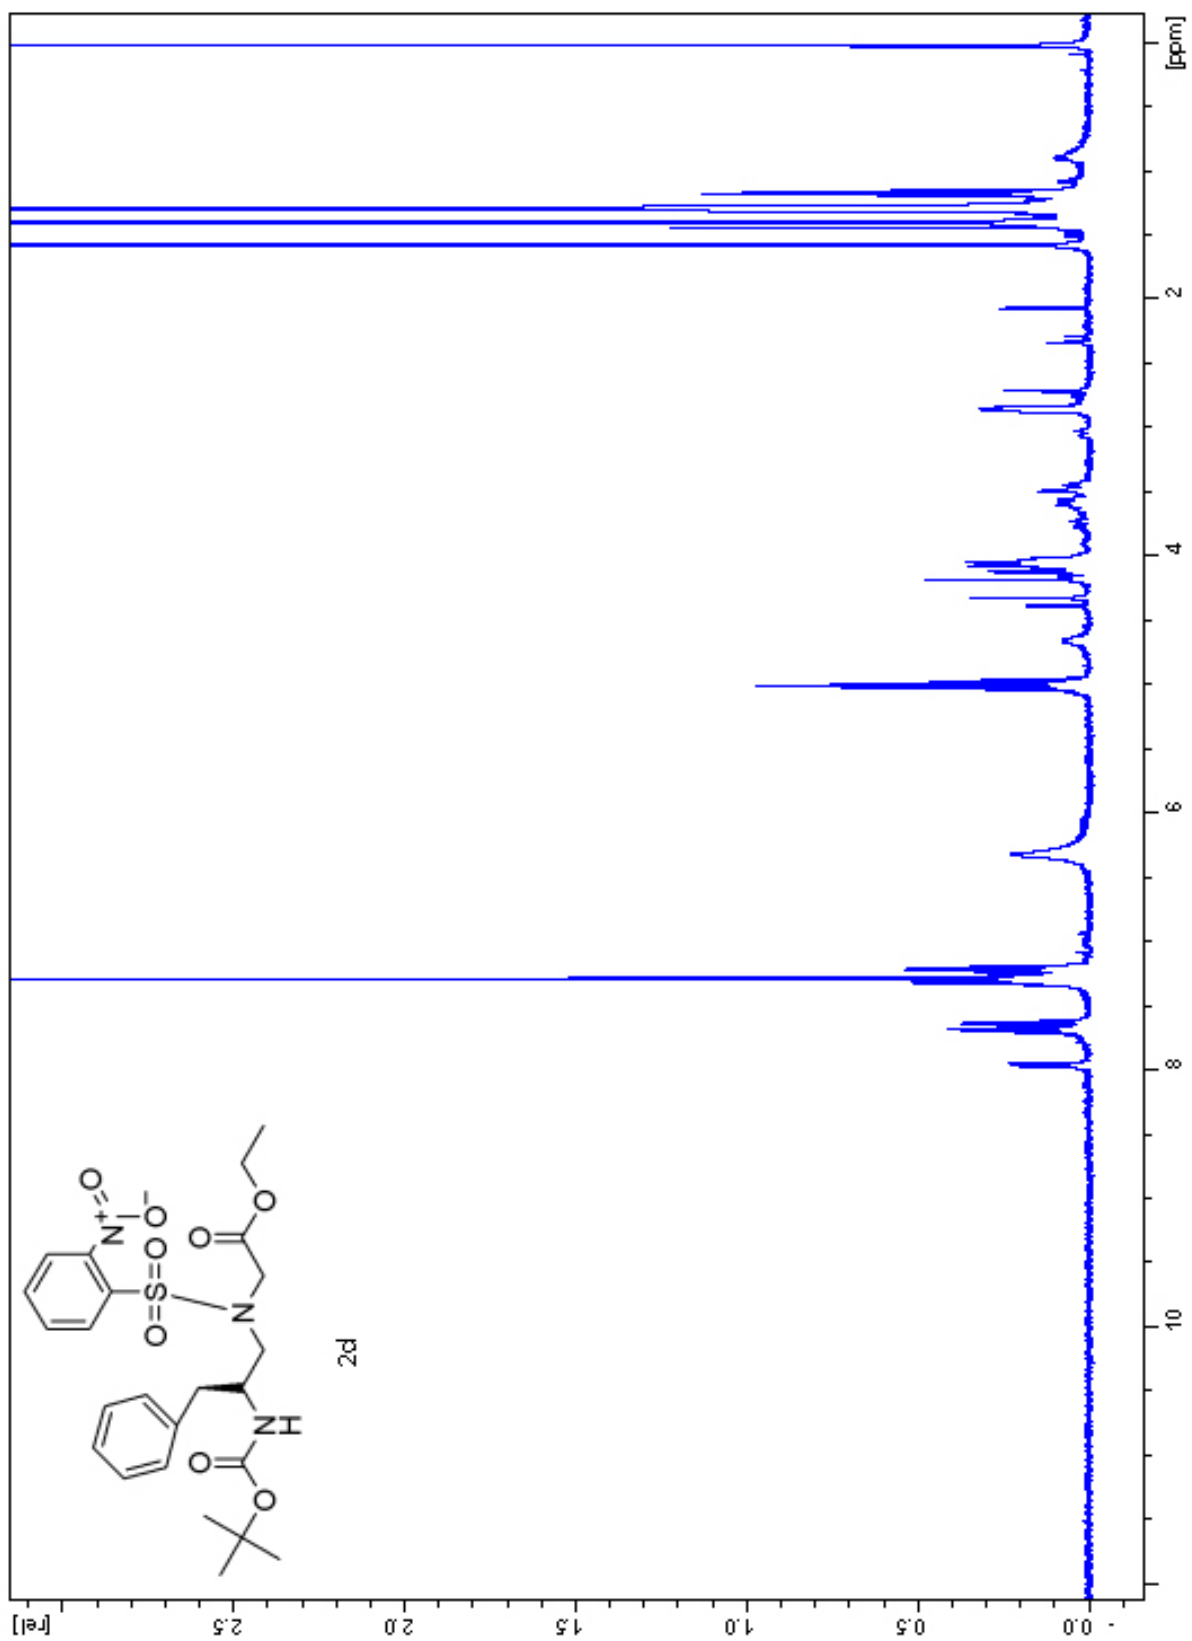

$^1\text{H}$  NMR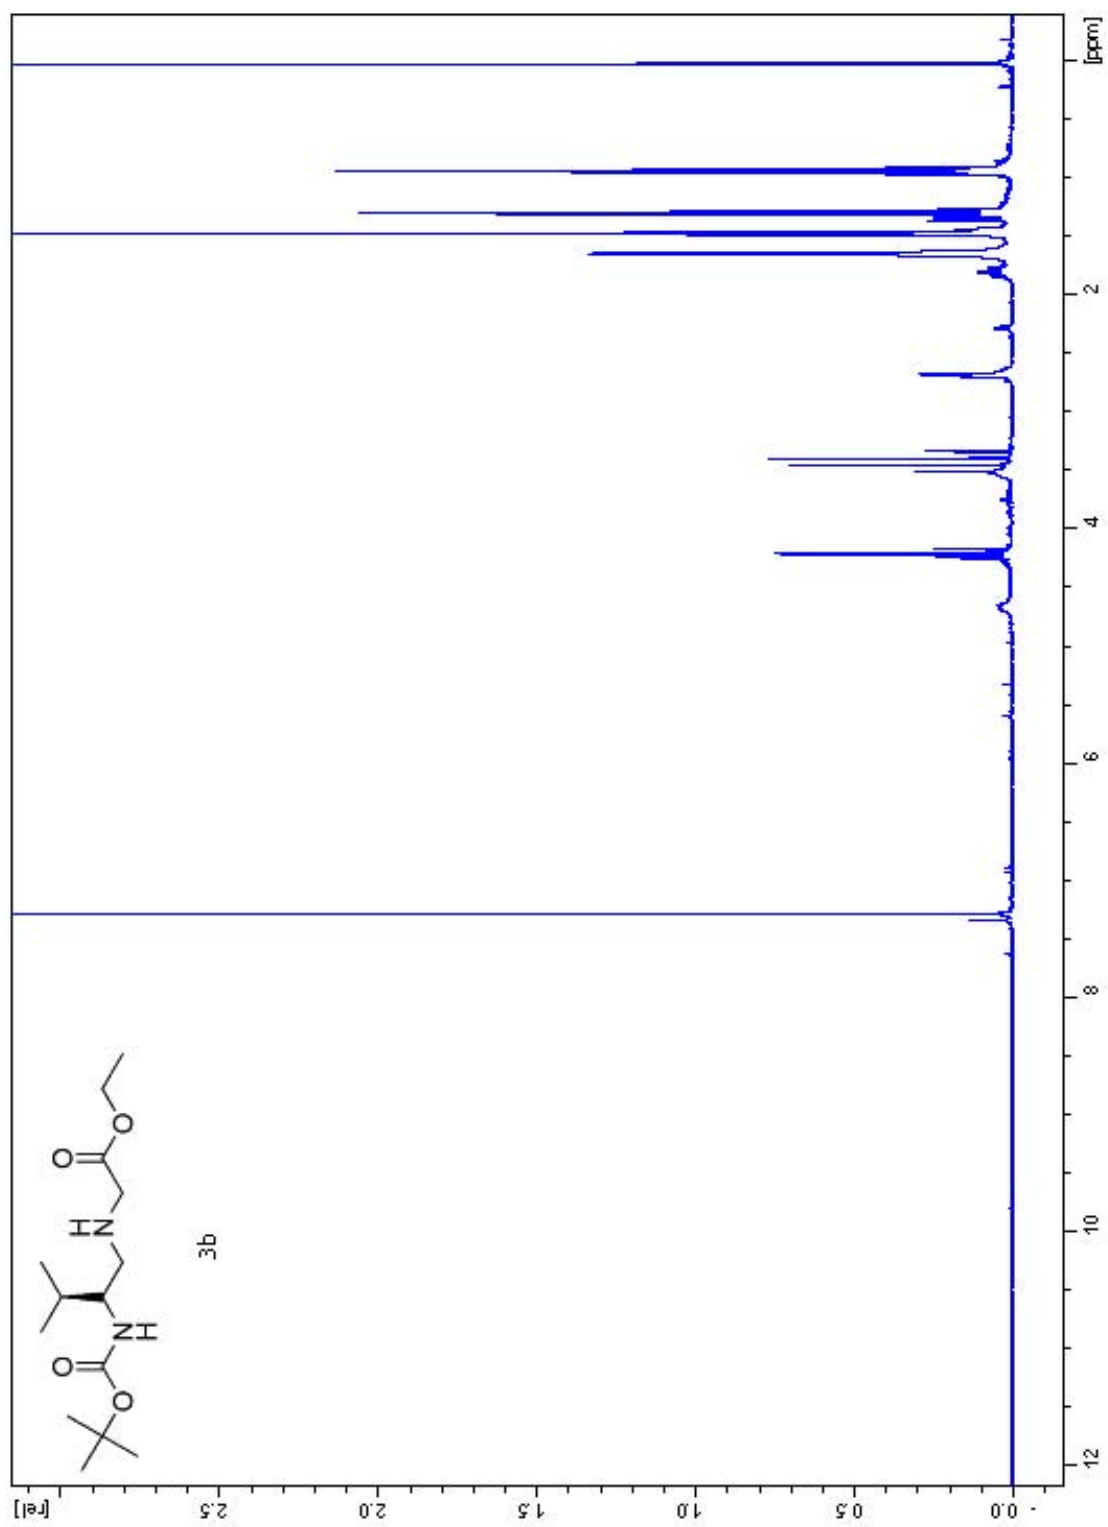

$^{13}\text{C}$  NMR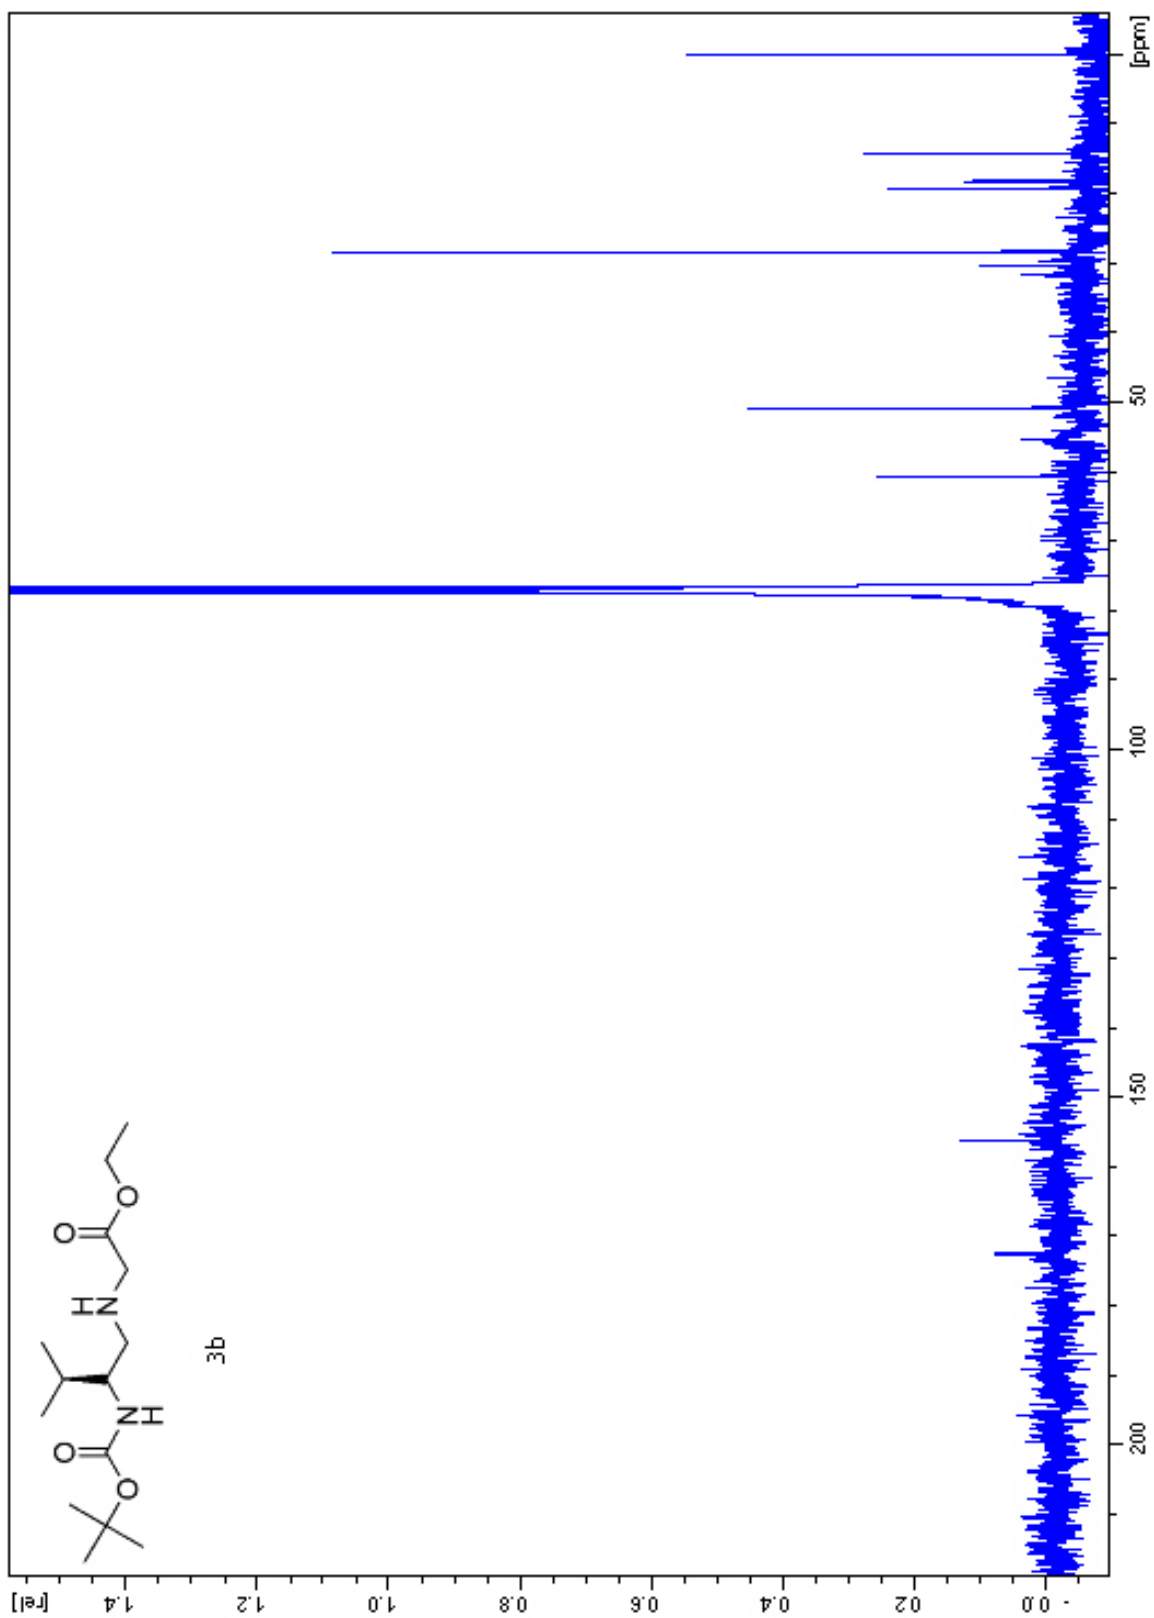

$^1\text{H}$  NMR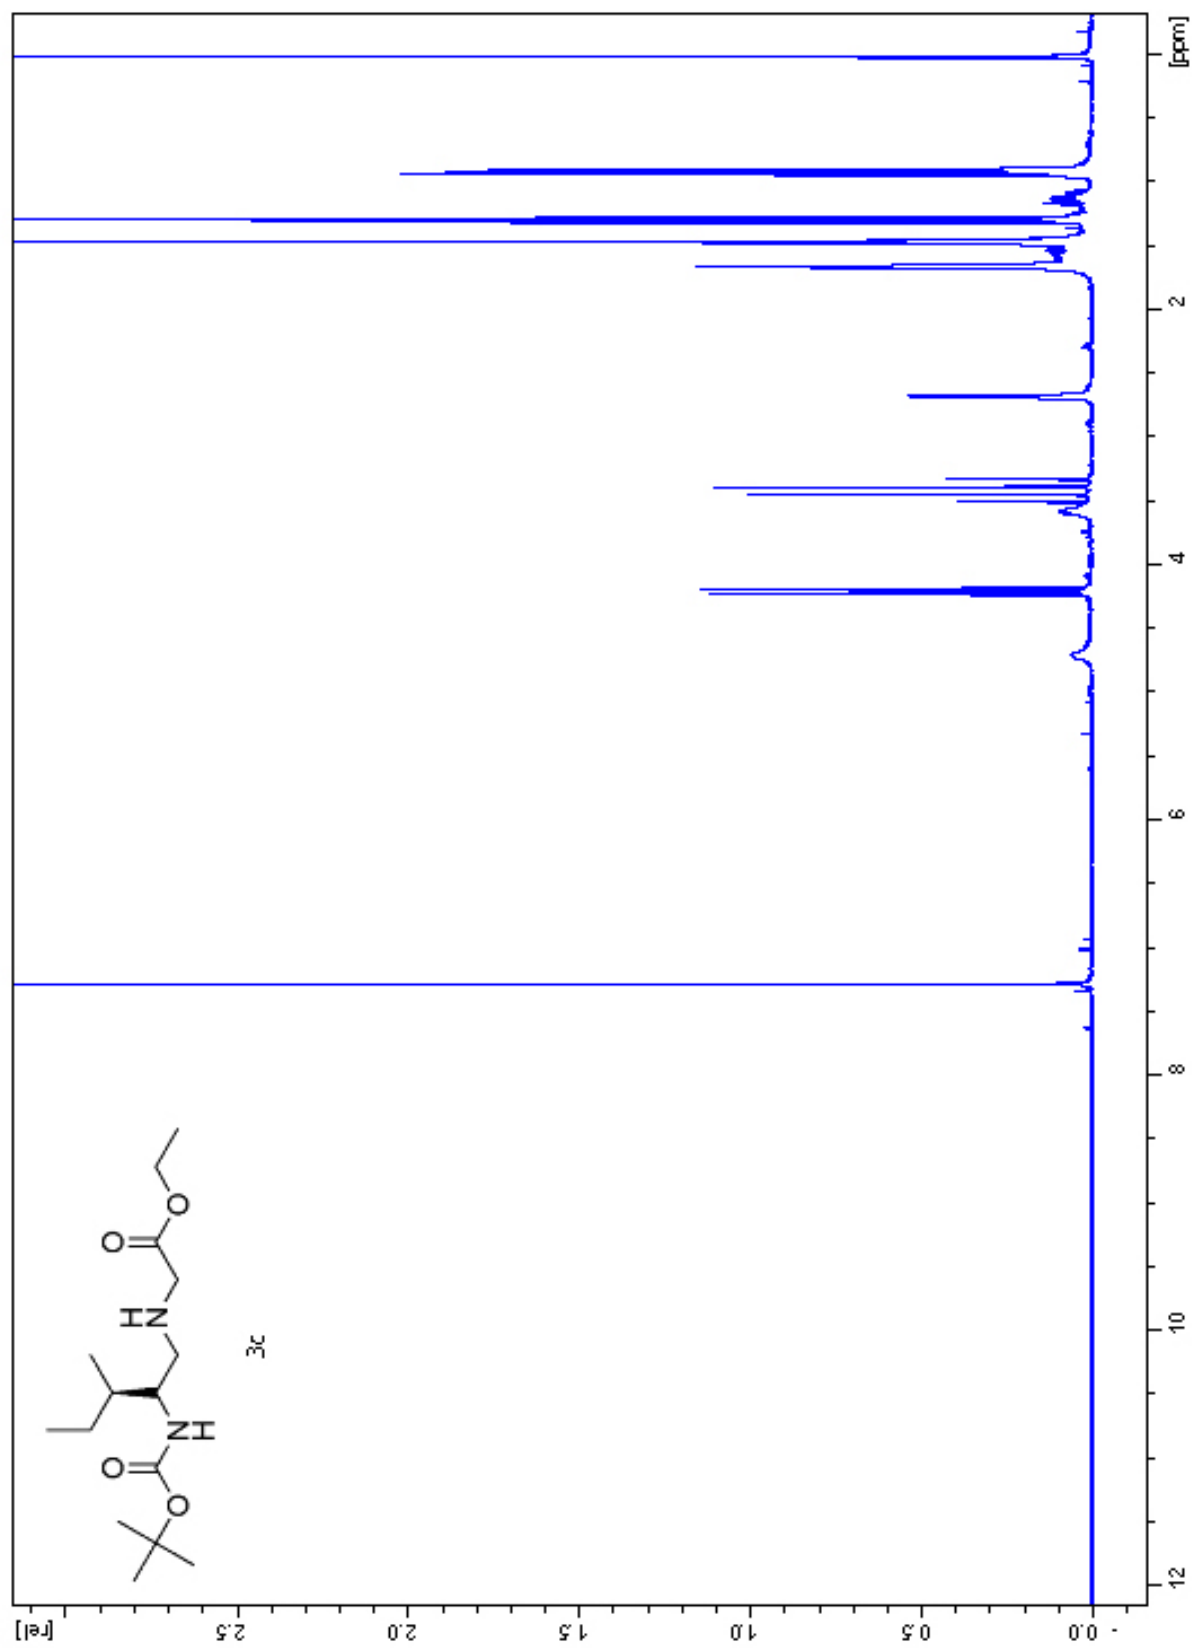

$^{13}\text{C}$  NMR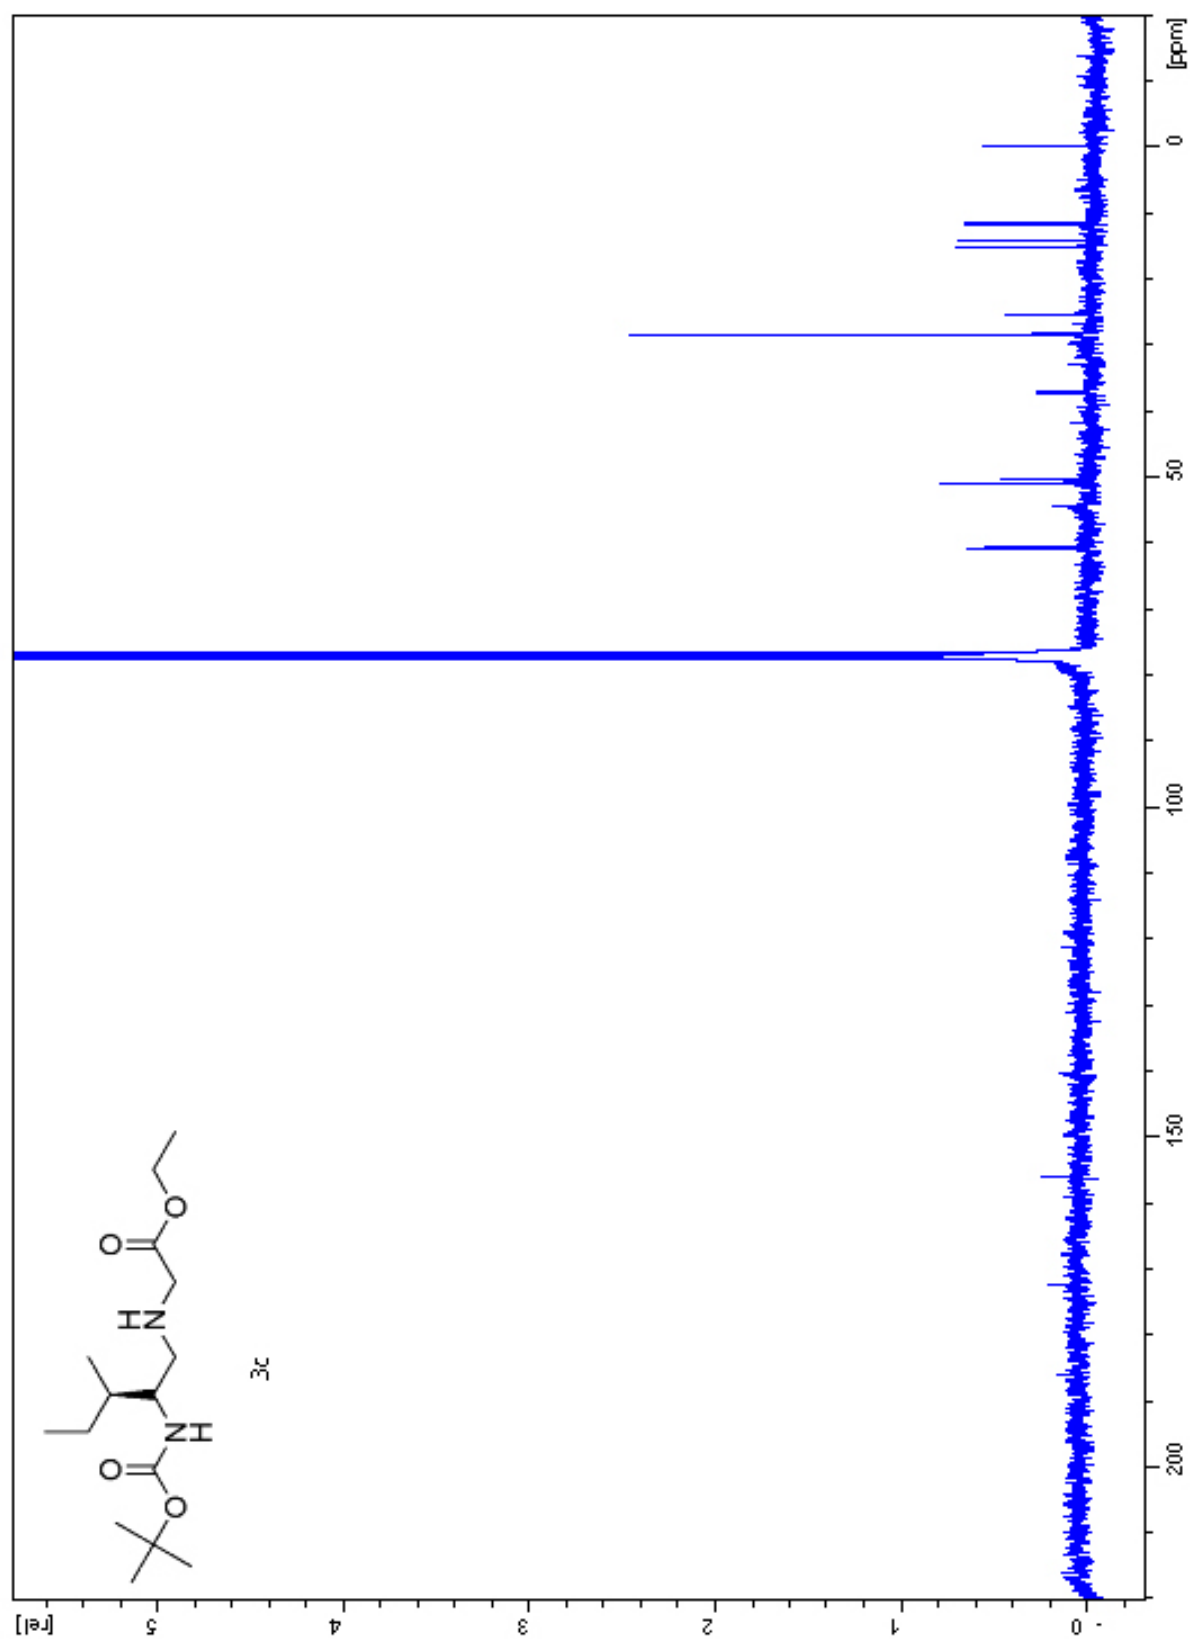

$^1\text{H}$  NMR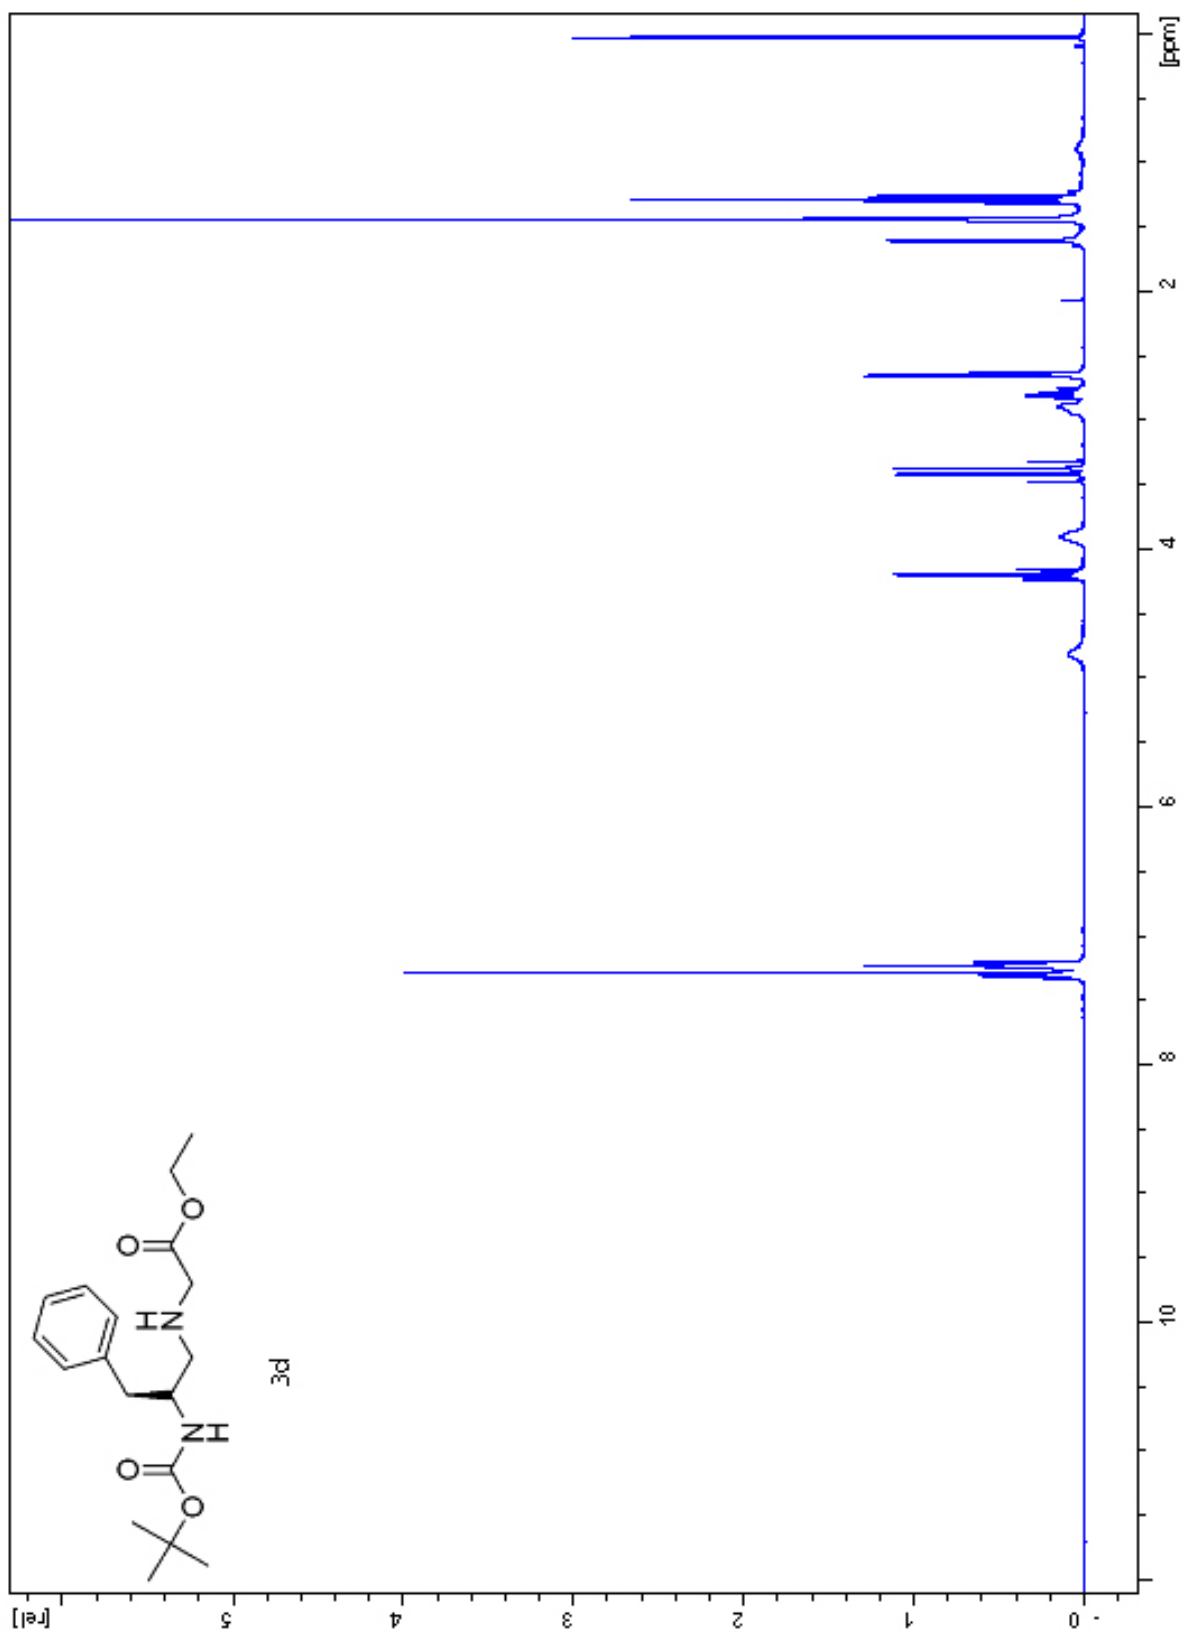



$^{13}\text{C}$  NMR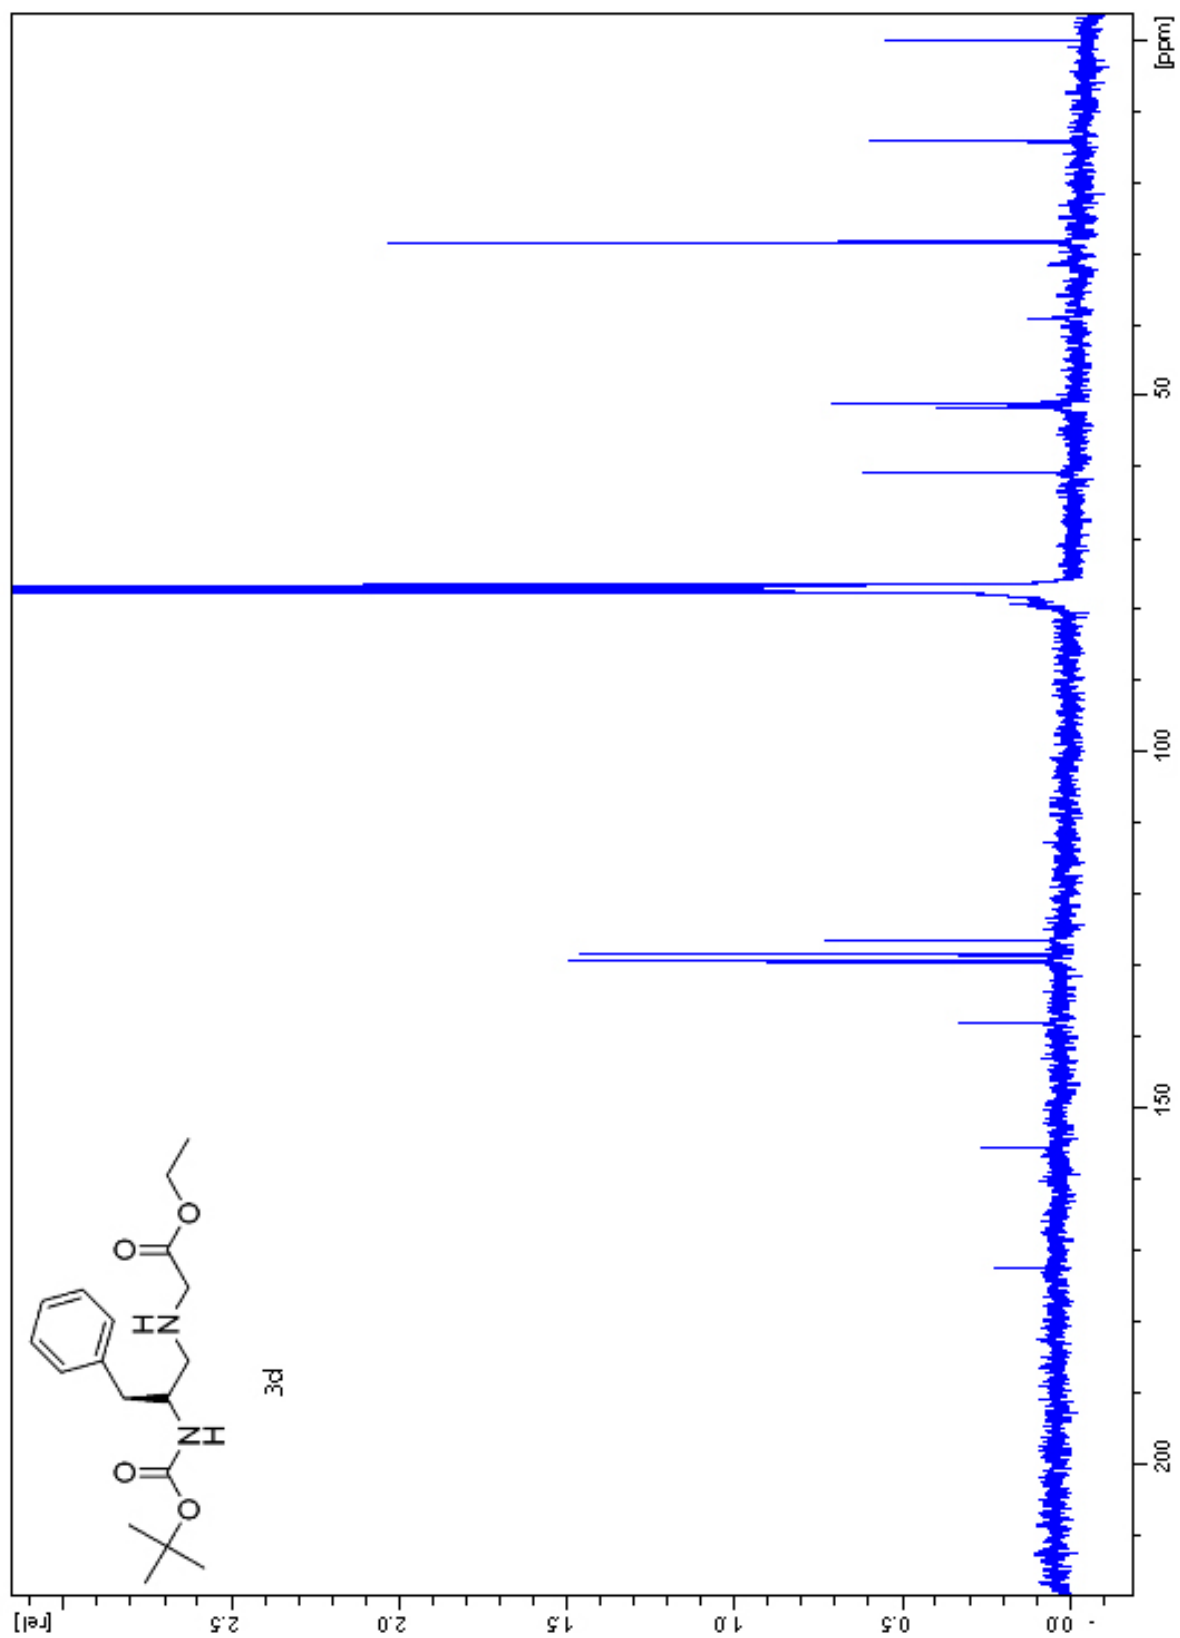

$^1\text{H}$  NMR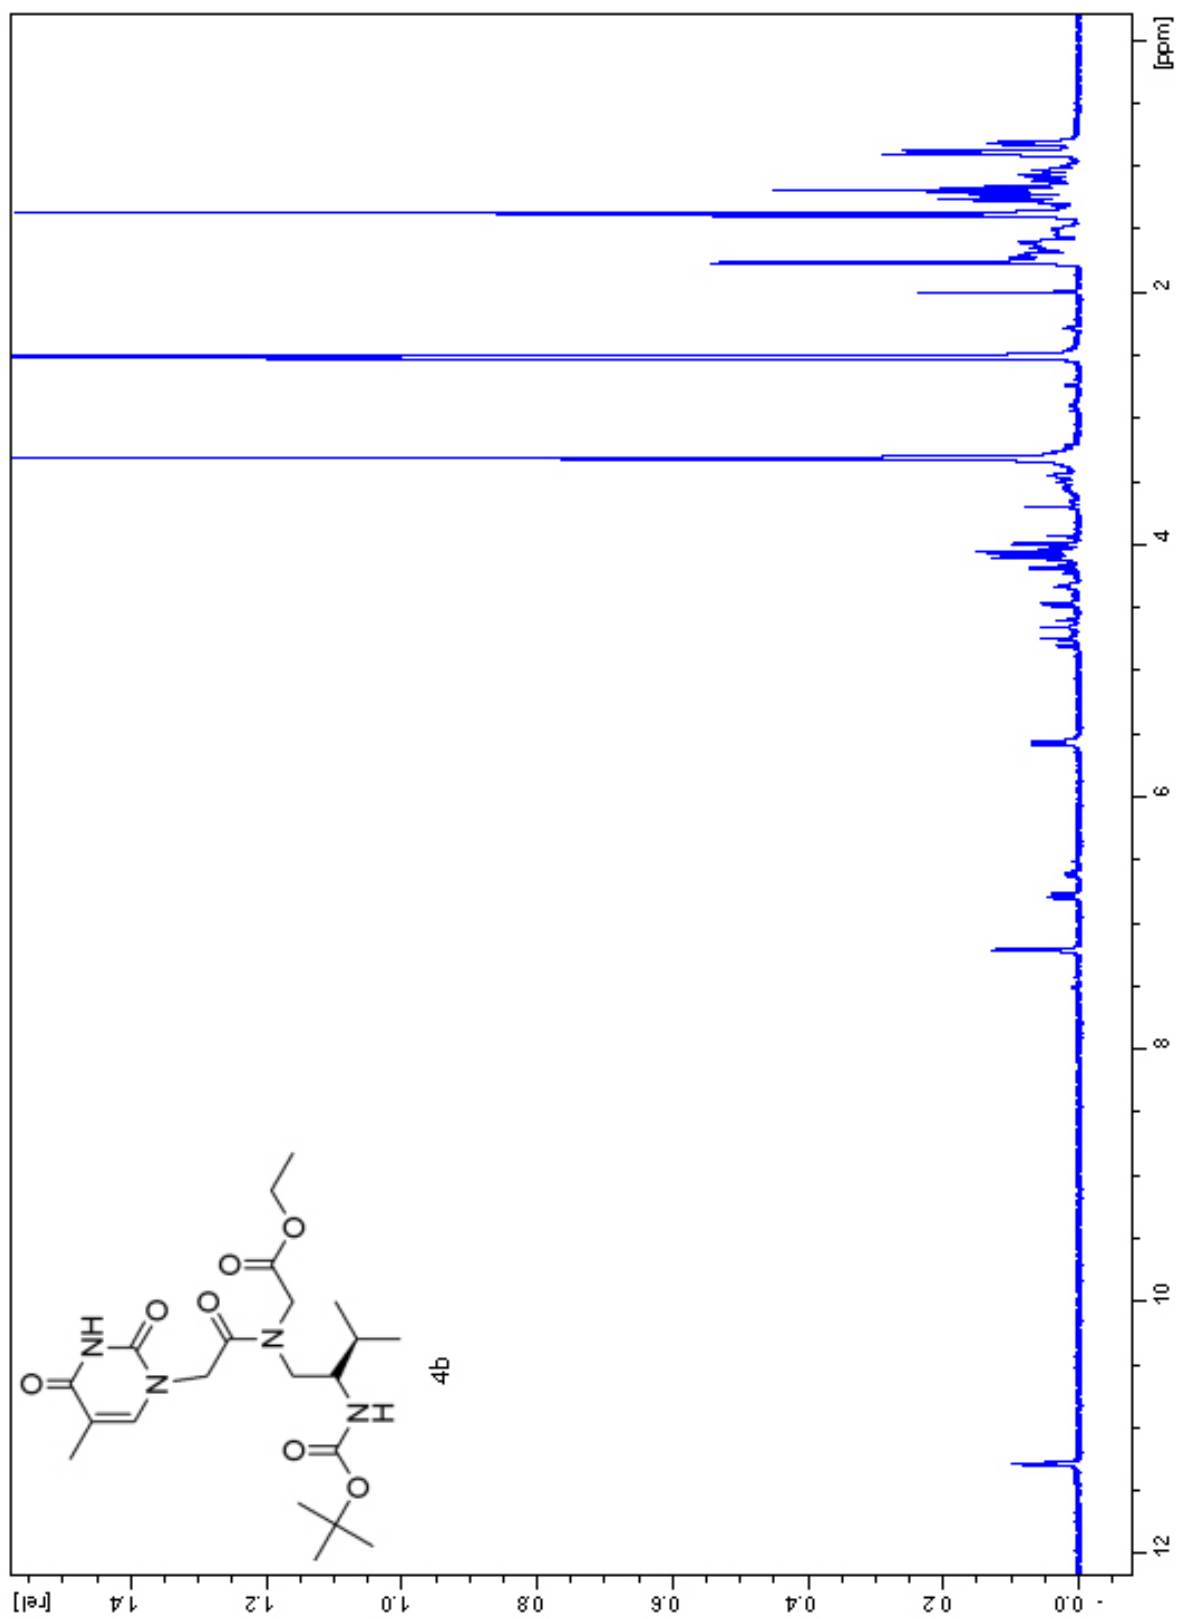

$^1\text{H}$  NMR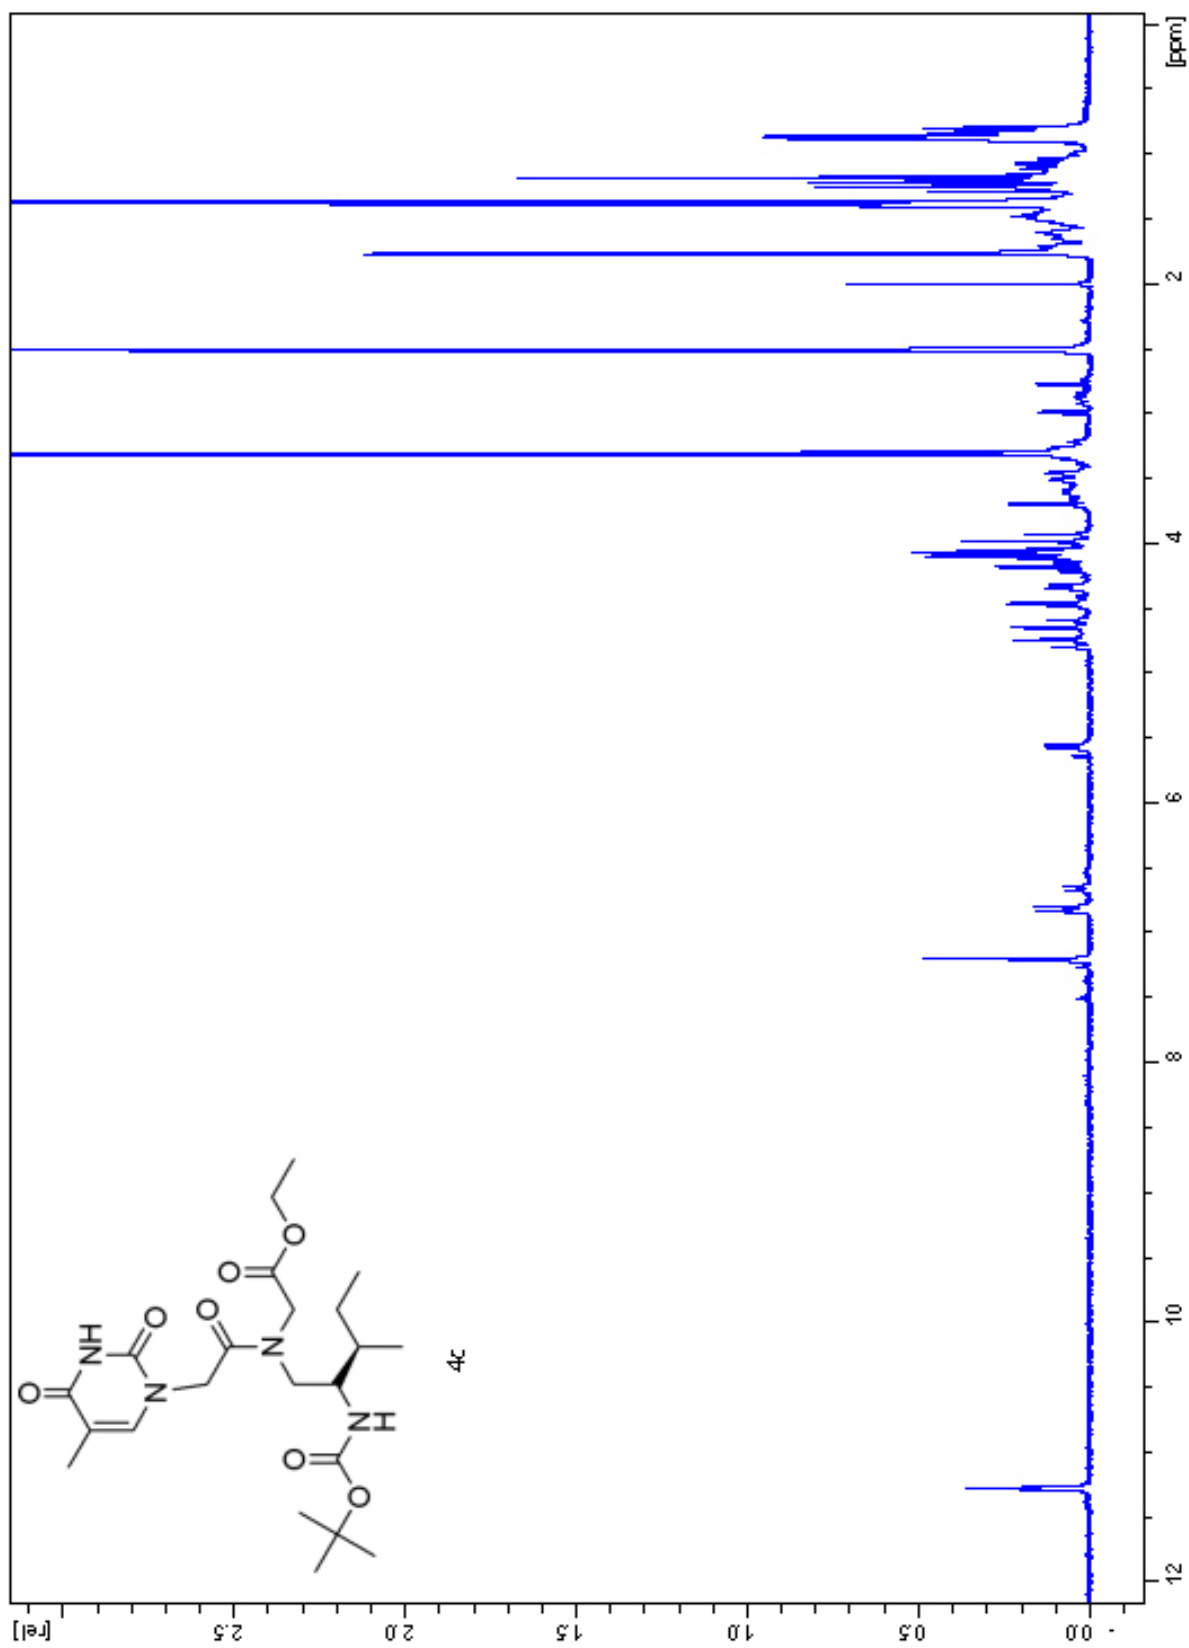

$^1\text{H}$  NMR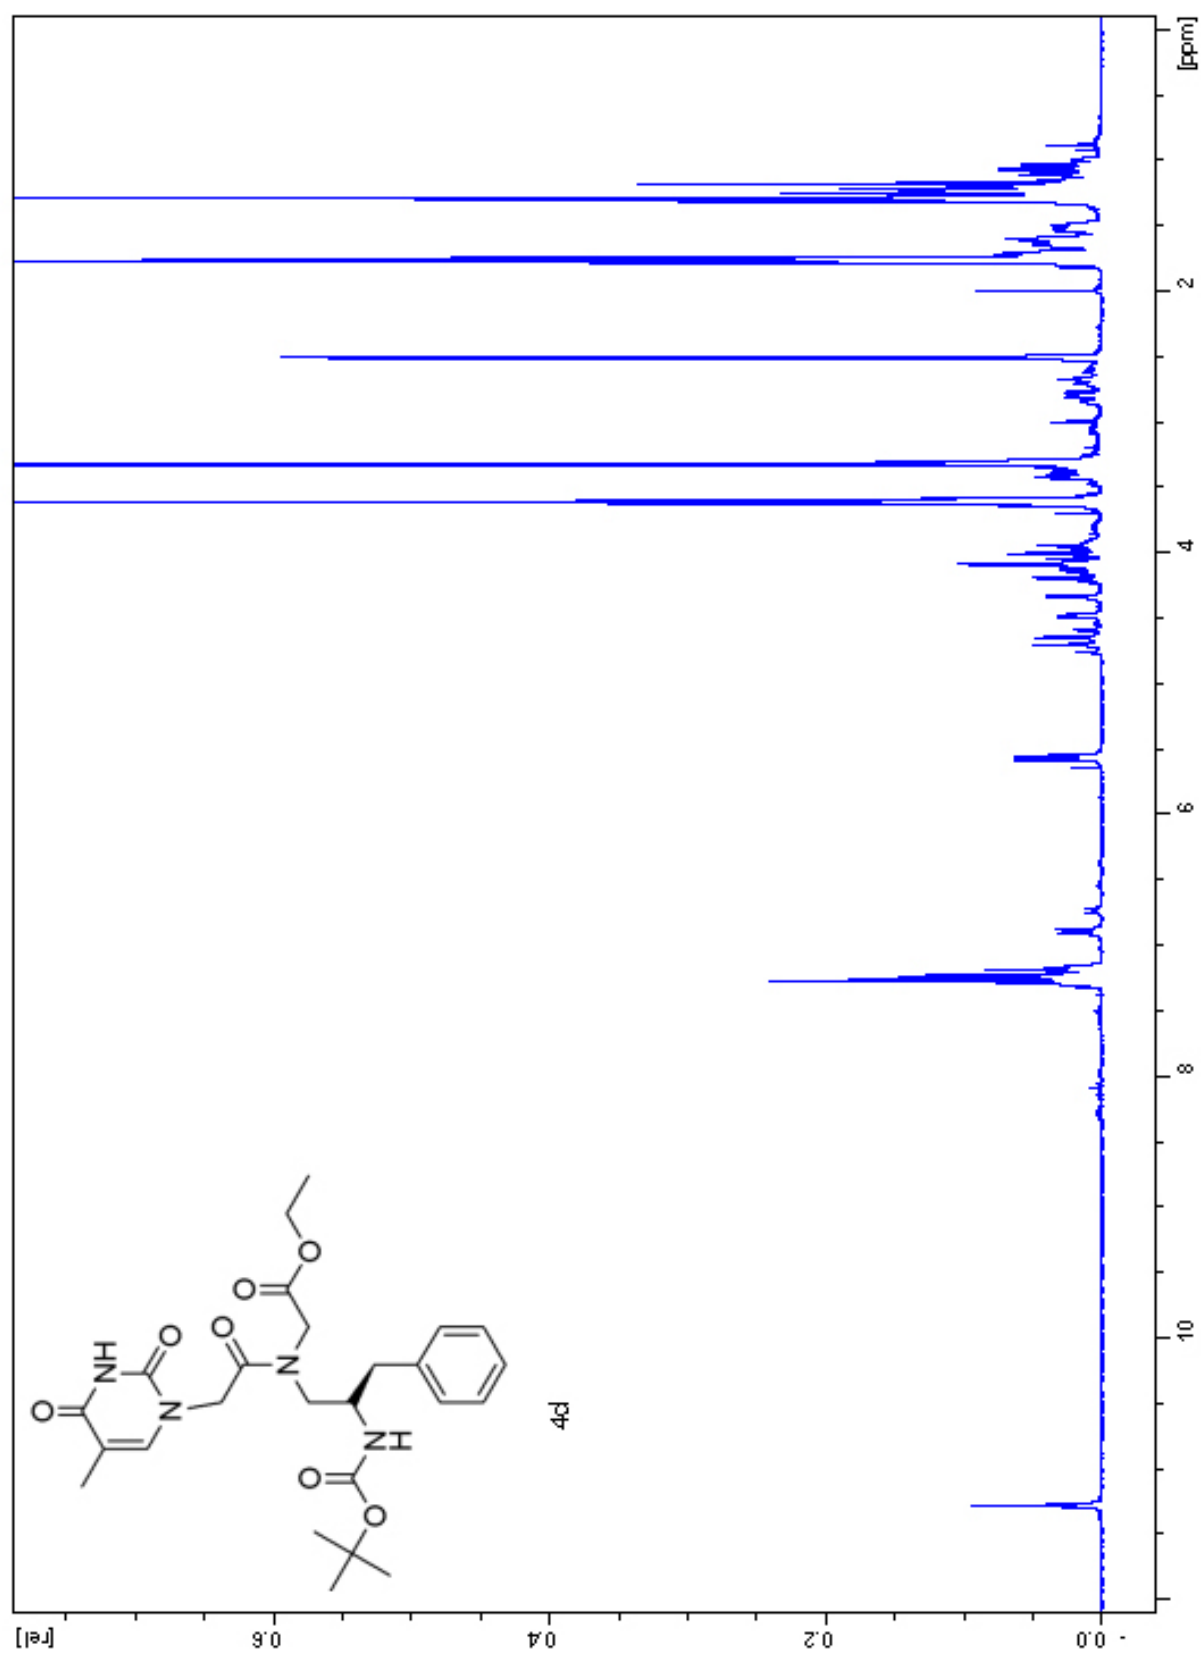

$^1\text{H}$  NMR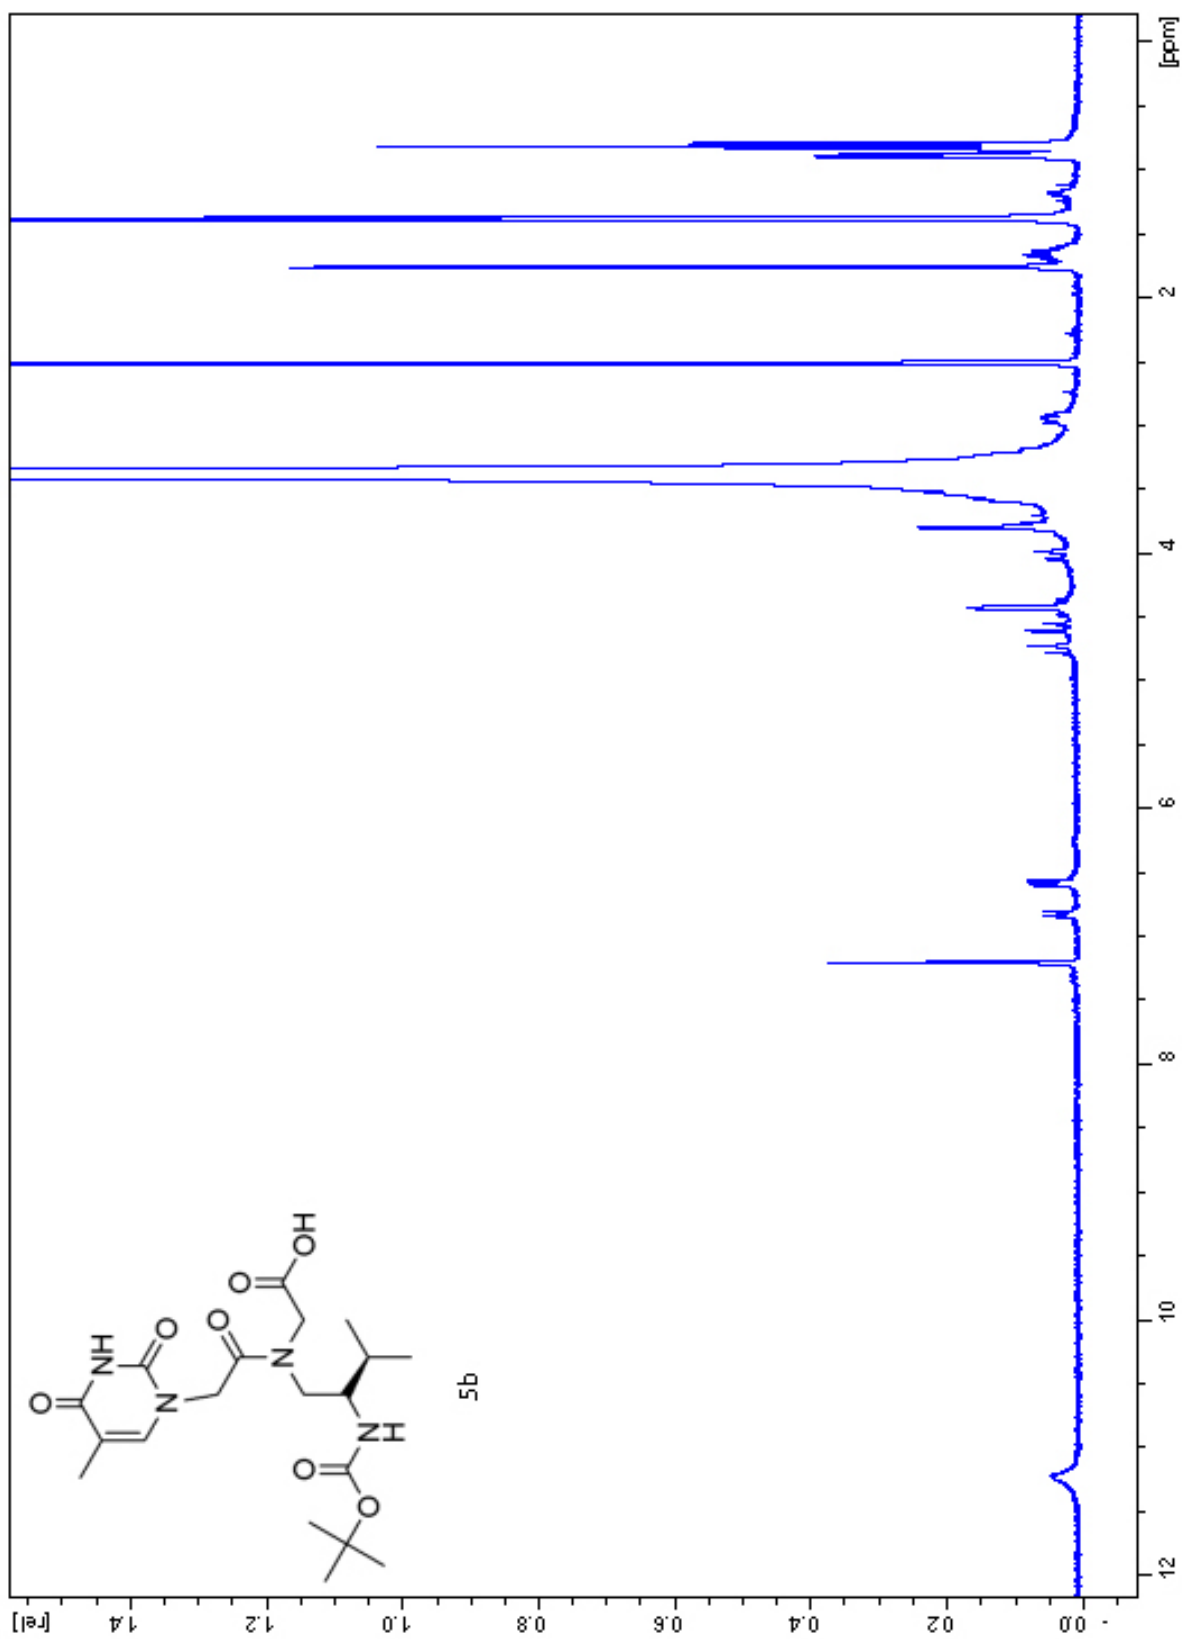

$^{13}\text{C}$  NMR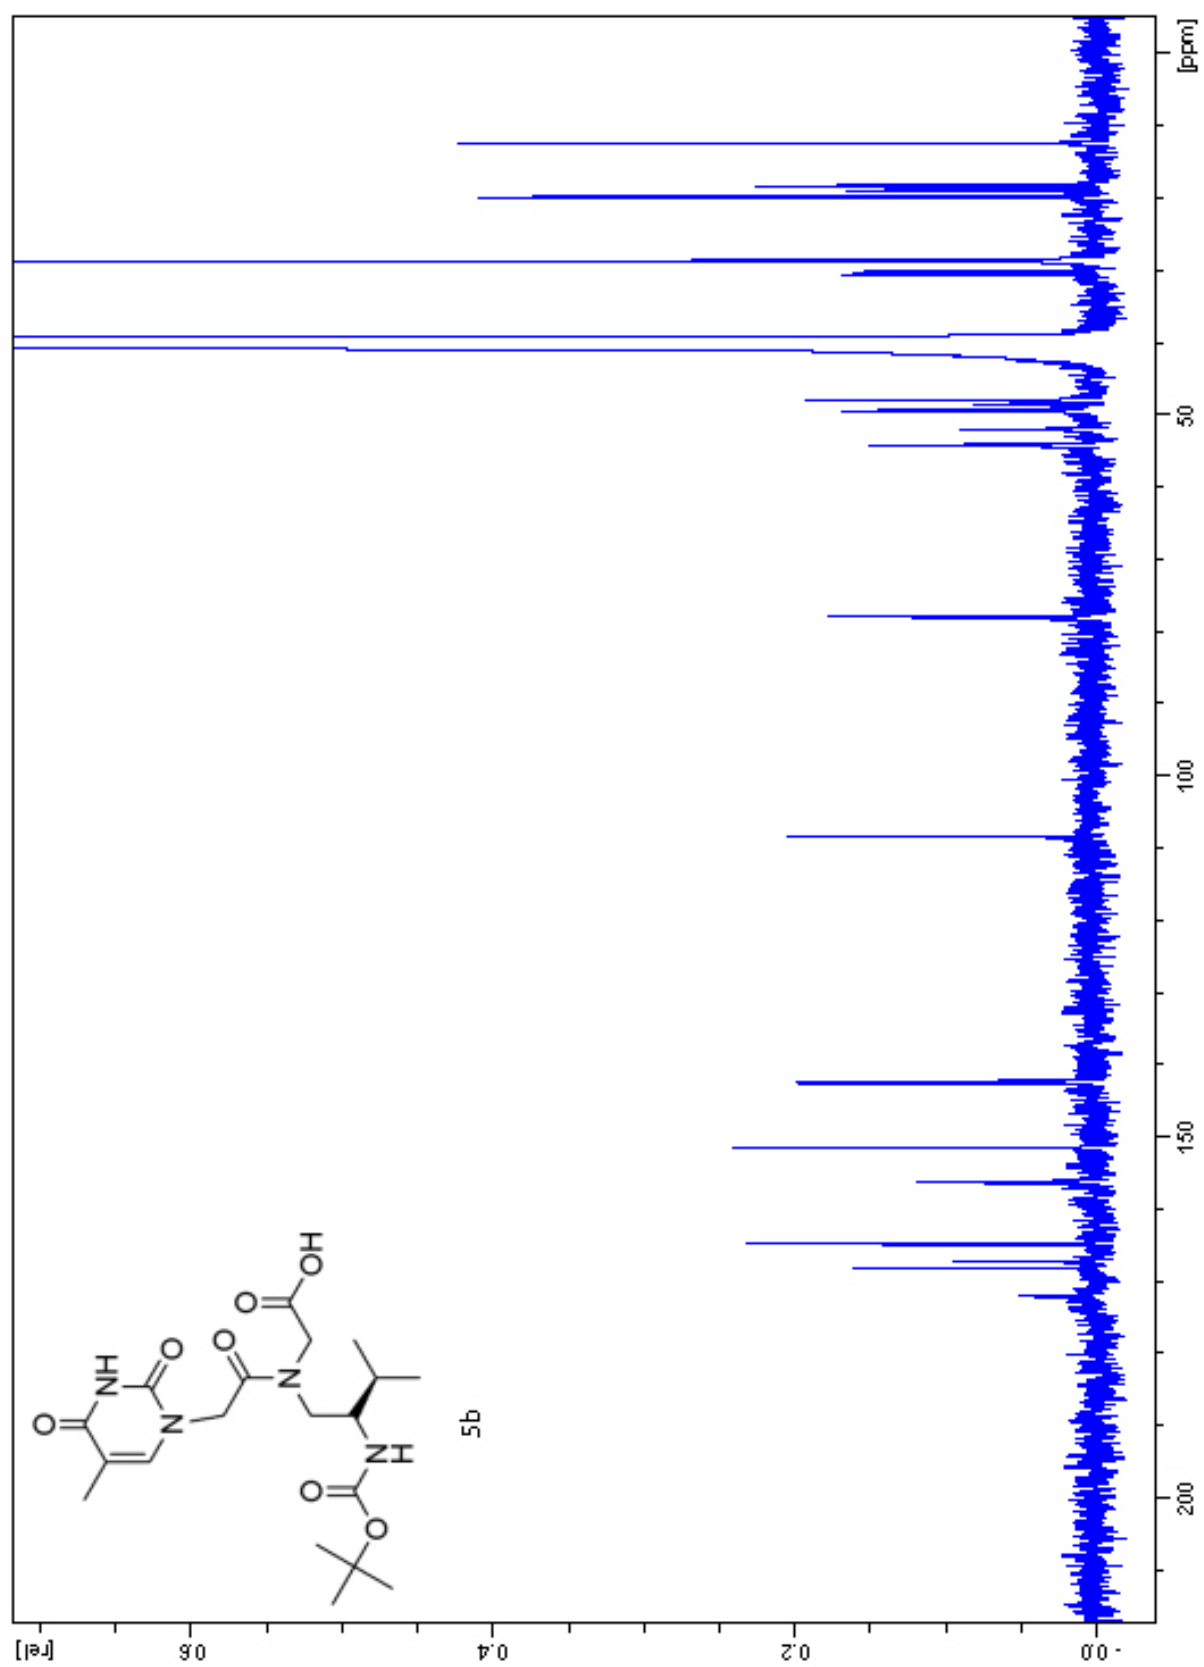



$^{13}\text{C}$  NMR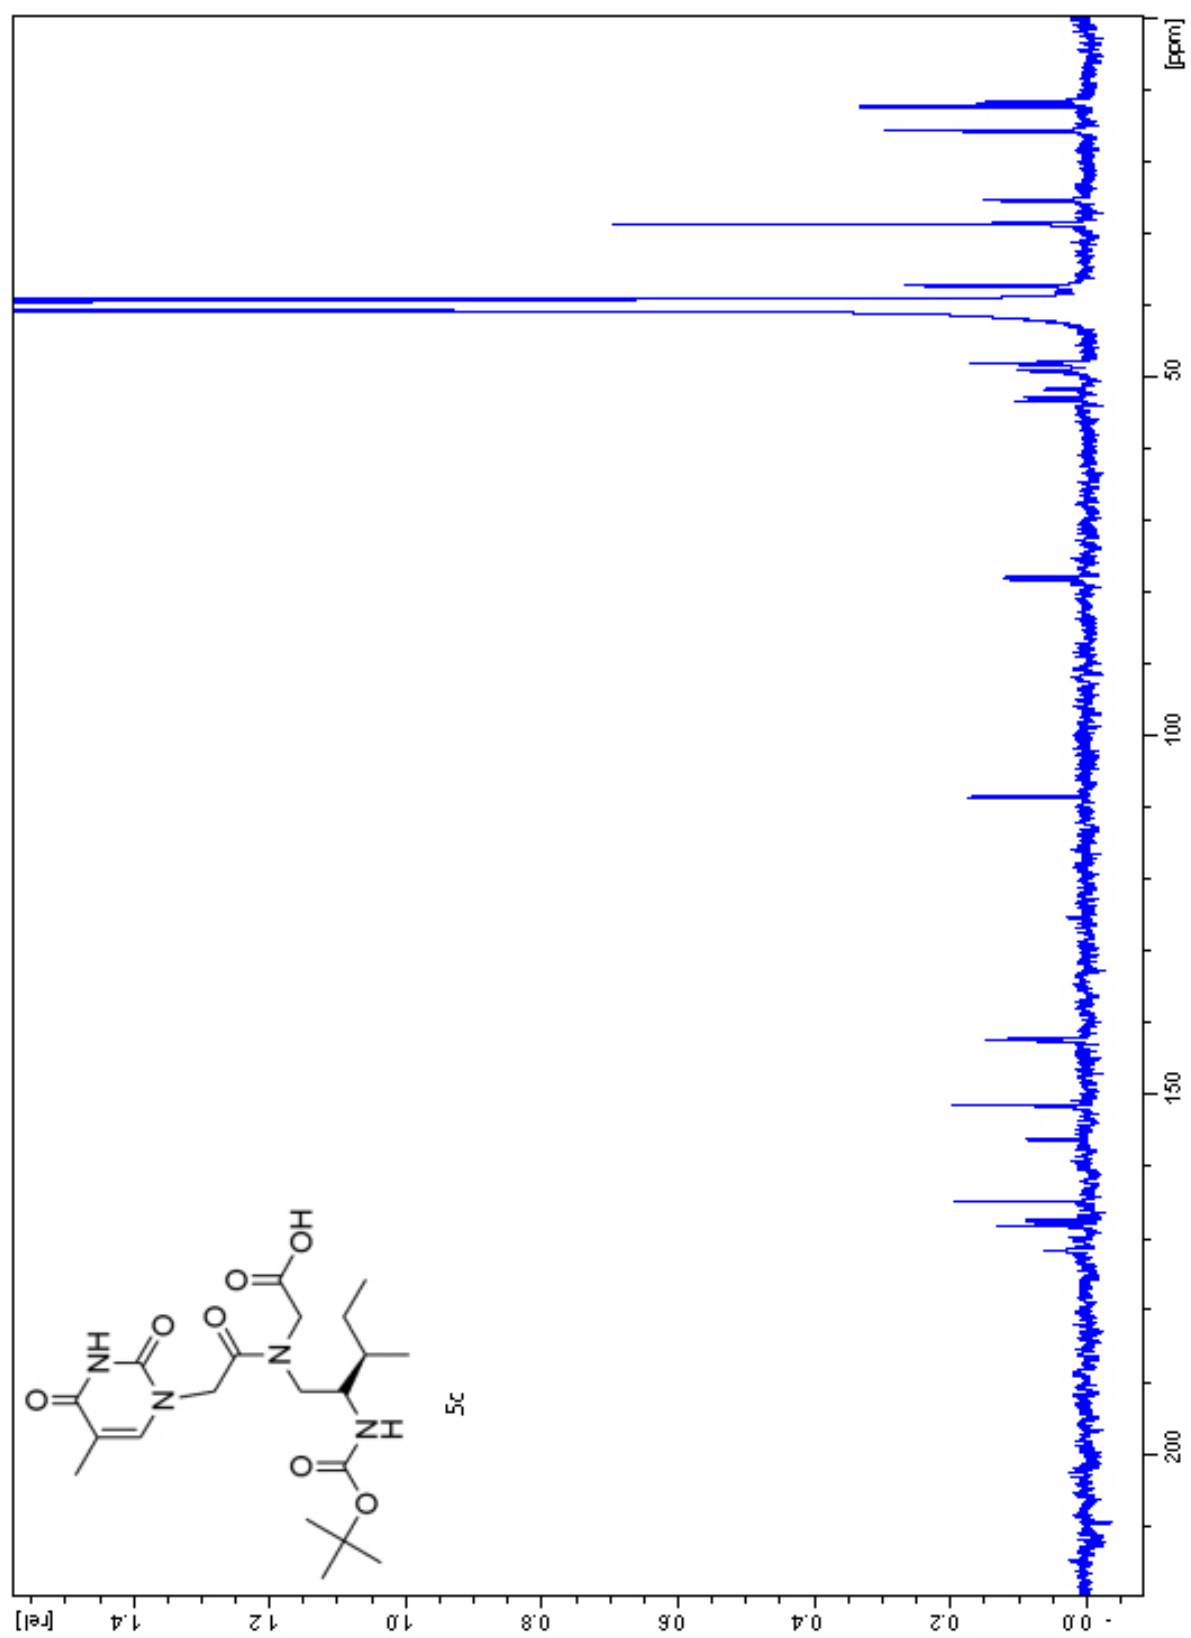



$^1\text{H}$  NMR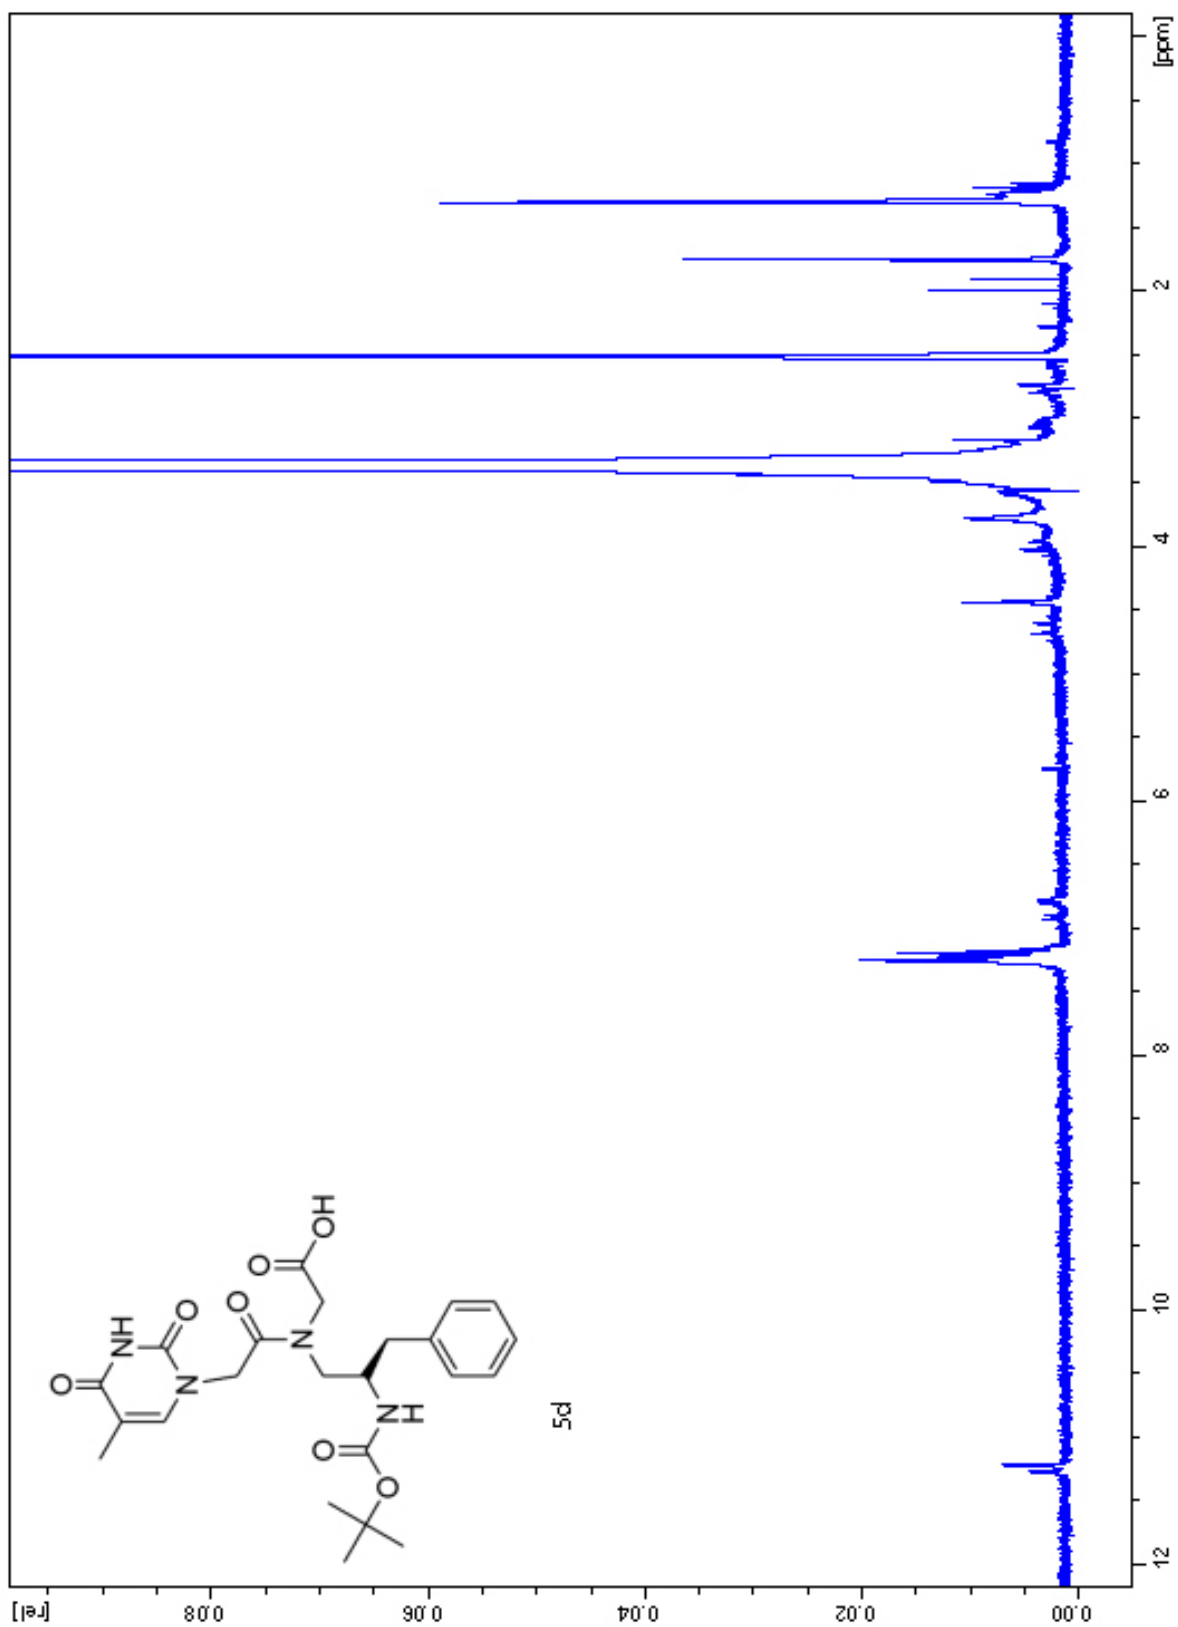

$^{13}\text{C}$  NMR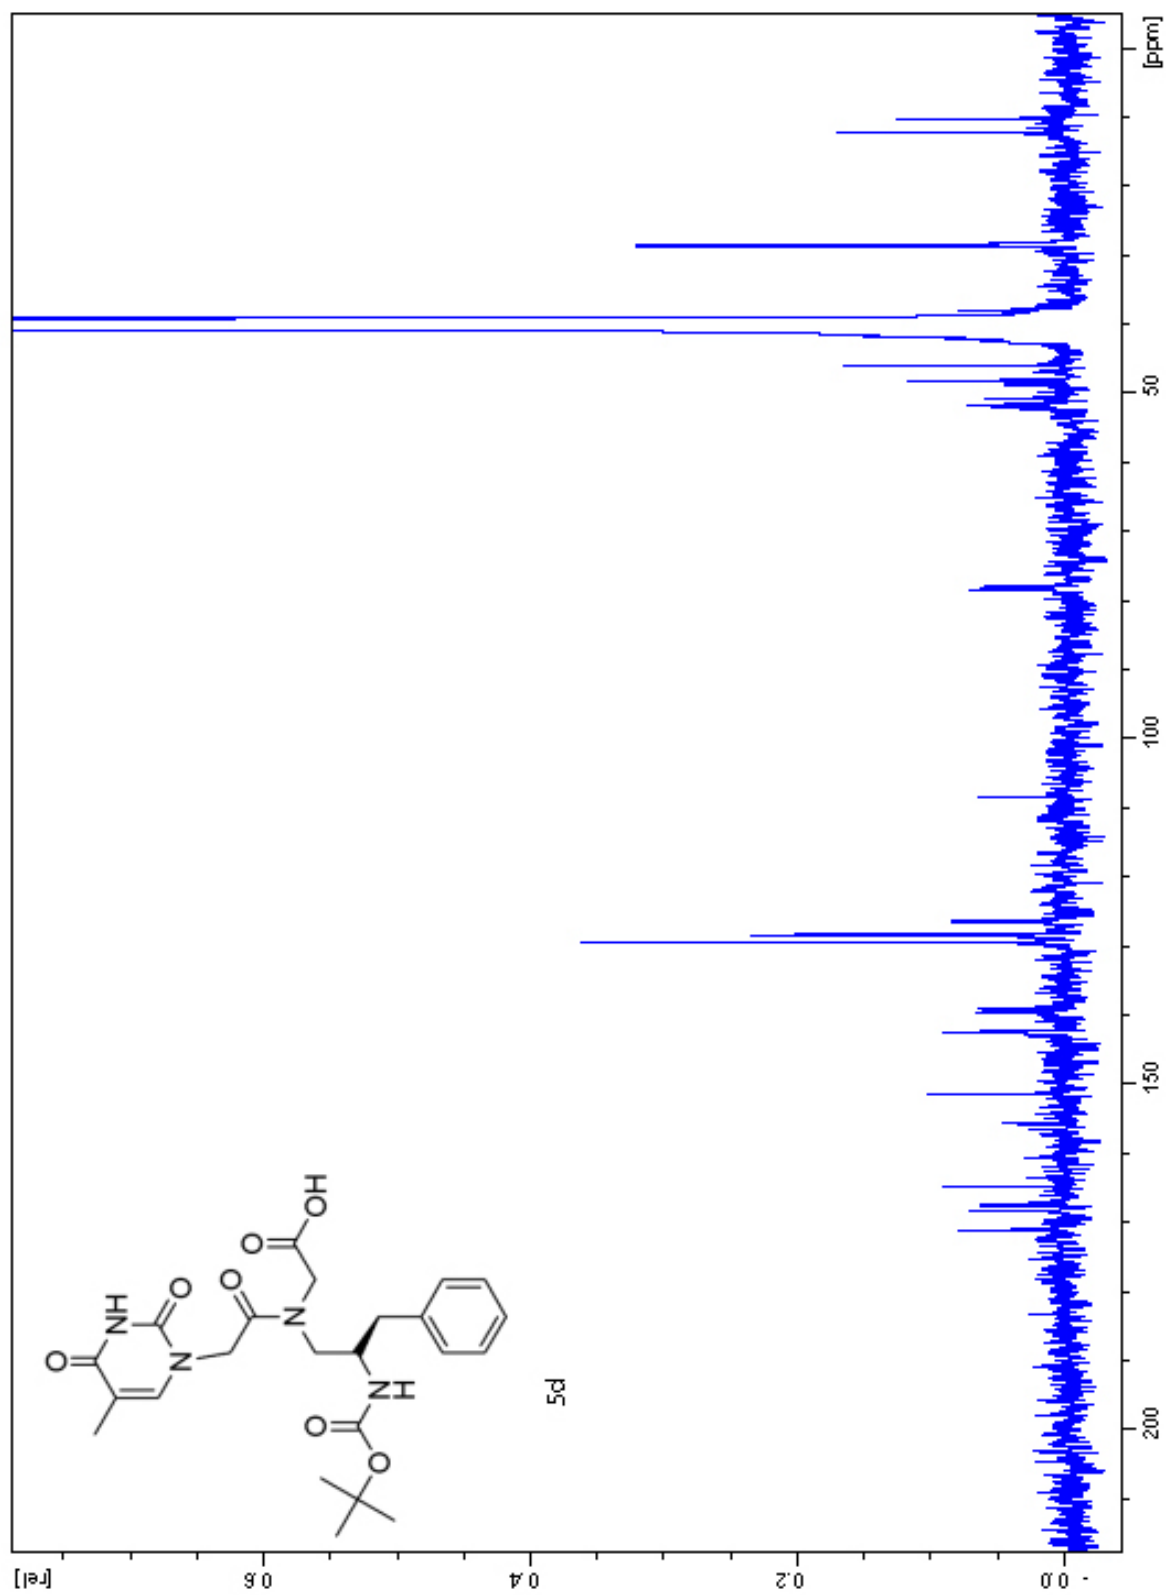

Supplement: 652702.f1.pdf [file 652702.f1.pdf]
